1 **Angiotensin Counteracts the Negative Regulatory Effect of Host WWOX on Viral PPxY-**

2 **Mediated Egress**

3  
4 Jingjing Liang<sup>1</sup>, Gordon Ruthel<sup>1</sup>, Cari A. Sagum<sup>2</sup>, Mark T. Bedford<sup>2</sup>, Sachdev S. Sidhu<sup>3</sup>, Marius  
5 Sudol<sup>4</sup>, Chaitanya K. Jaladanki<sup>5</sup>, Hao Fan<sup>5,6,7</sup>, Bruce D. Freedman<sup>1</sup>, and Ronald N. Harty<sup>1\*</sup>  
6

7• <sup>1</sup>Department of Pathobiology, School of Veterinary Medicine, University of Pennsylvania, 3800  
8 Spruce Street, Philadelphia, PA 19104, USA; <sup>2</sup>Department of Epigenetics & Molecular  
9 Carcinogenesis, M.D. Anderson Cancer Center, University of Texas, Smithville, Texas, USA;  
10 <sup>3</sup>Department of Molecular Genetics, University of Toronto, Toronto, Ontario, Canada; <sup>4</sup>Department of  
11 Medicine, Icahn School of Medicine at Mount Sinai, New York, New York 10029, USA;  
12 <sup>5</sup>Bioinformatics Institute, Agency for Science, Technology and Research (A\*STAR), 30 Biopolis  
13 Street, Matrix #07-01, Singapore 138671; <sup>6</sup>Department of Biological Sciences (DBS), National  
14 University of Singapore, Singapore 119077; <sup>7</sup>Center for Computational Biology, DUKE-NUS Medical  
15 School, Singapore 169857.  
16

17 **\*Corresponding Author:** Dr. Ronald N. Harty, Professor, Department of Pathobiology, School of  
18 Veterinary Medicine, University of Pennsylvania, 3800 Spruce Street, Philadelphia, PA 19104, USA.  
19 Phone: 215-573-4485, Fax: 215-898-7887, Email: [rharty@vet.upenn.edu](mailto:rharty@vet.upenn.edu)  
20

21 **Keywords:** Ebola, Marburg, Lassa, WWOX, Angiotensin, VLPs, budding, WW-domain, PPxY motif  
22  
23

24

25

26 **Abstract**

27 *Filoviridae* family members Ebola (EBOV) and Marburg (MARV) viruses and *Arenaviridae* family  
28 member Lassa virus (LASV) are emerging pathogens that can cause hemorrhagic fever and high  
29 rates of mortality in humans. A better understanding of the interplay between these viruses and the  
30 host will inform about the biology of these pathogens, and may lead to the identification of new  
31 targets for therapeutic development. Notably, expression of the filovirus VP40 and LASV Z matrix  
32 proteins alone drives assembly and egress of virus-like particles (VLPs). The conserved PPxY Late  
33 (L) domain motifs in the filovirus VP40 and LASV Z proteins play a key role in the budding process by  
34 mediating interactions with select host WW-domain containing proteins that then regulate virus  
35 egress and spread. To identify the full complement of host WW-domain interactors, we utilized WT  
36 and PPxY mutant peptides from EBOV and MARV VP40 and LASV Z proteins to screen an array of  
37 GST-WW-domain fusion proteins. We identified WW domain-containing oxidoreductase (WWOX) as  
38 a novel PPxY-dependent interactor, and we went on to show that full-length WWOX physically  
39 interacts with eVP40, mVP40 and LASV Z to negatively regulate egress of VLPs and of a live  
40 VSV/Ebola recombinant virus (M40). Interestingly, WWOX is a versatile host protein that regulates  
41 multiple signaling pathways and cellular processes via modular interactions between its WW-domains  
42 and PPxY motifs of select interacting partners, including host angiominin (AMOT). Notably, we  
43 demonstrated recently that expression of endogenous AMOT not only positively regulates egress of  
44 VLPs, but also promotes egress and spread of live EBOV and MARV. Toward the mechanism of  
45 action, we show that the competitive and modular interplay among WWOX-AMOT-VP40/Z regulates  
46 VLP and M40 virus egress. Thus, WWOX is the newest member of an emerging group of host WW-  
47 domain interactors (e.g. BAG3; YAP/TAZ) that negatively regulate viral egress. These findings further

48 highlight the complex interplay of virus-host PPxY/WW-domain interactions and their potential impact  
49 on the biology of both the virus and the host during infection.

## 50 **Author Summary**

51 Filoviruses (Ebola [EBOV] and Marburg [MARV]) and arenavirus (Lassa virus; LASV) are zoonotic,  
52 emerging pathogens that cause outbreaks of severe hemorrhagic fever in humans. A fundamental  
53 understanding of the virus-host interface is critical for understanding the biology of these viruses and  
54 for developing future strategies for therapeutic intervention. Here, we identified host WW-domain  
55 containing protein WWOX as a novel interactor with VP40 and Z, and showed that WWOX inhibited  
56 budding of VP40/Z virus-like particles (VLPs) and live virus in a PPxY/WW-domain dependent  
57 manner. Our findings are important to the field as they expand the repertoire of host interactors found  
58 to regulate PPxY-mediated budding of RNA viruses, and further highlight the competitive interplay  
59 and modular virus-host interactions that impact both the virus lifecycle and the host cell.

73

74

## 75 **Introduction**

76 Hemorrhagic fever viruses (HFV) are global public health threats that can cause sporadic  
77 outbreaks and severe disease in humans (1). Among these emerging pathogens, Filoviridae family  
78 members Ebola (EBOV) and Marburg (MARV) viruses and Arenaviridae family member Lassa virus  
79 (LASV) represent three deadly HFVs (2, 3) that have been the cause of numerous and recent  
80 outbreaks of disease (4-6). A better understanding of the molecular aspects of HFV infections and  
81 host interactions is critical for the development of new countermeasures to combat these emerging  
82 pathogens.

83 The VP40 matrix proteins of EBOV and MARV, and the Z matrix protein of LASV coordinate virion  
84 assembly and mediate egress of infectious virus (7-14). Independent expression of VP40 or Z in  
85 mammalian cells leads to the formation and egress virus-like particles (VLPs) via a mechanism that  
86 closely mimics formation and egress of infectious virions. To achieve this, VP40 and Z possess late  
87 (L) budding domains that function to recruit or hijack select host proteins that then aid in facilitating  
88 virus-cell separation and virus spread (15-20). For example, the amino acid sequence of PPxY is a  
89 conserved L-domain motif in eVP40, mVP40 and LASV-Z, and early studies by our group and others  
90 demonstrated that viral PPxY motif mediates interactions with specific WW-domain containing host  
91 proteins (21-23) such as E3 ubiquitin ligases (*e.g.* Nedd4, Itch, and WWP1) to positively regulate  
92 virus egress (20, 24-29). Since L-domains are utilized by a wide range of viruses that have significant  
93 public health importance, the identification of common host interactors and regulators will provide  
94 important insights into the biology and pathogenesis of these viruses and may reveal new targets for  
95 the development of broad-spectrum antiviral strategies.

96 Recently, we screened an array composed of approximately 115 mammalian WW-domains  
97 displayed as GST fusion proteins, with either WT or PPxY-mutant peptides from VP40 and Z protein



98 in an effort to identify the full complement of host WW-domain interactors that may regulate virus  
99 egress and spread. In addition to identifying previously described positive interactors such as Nedd4,  
100 we surprisingly identified specific host WW-domain containing interactors (e.g. BAG3 and YAP/TAZ)  
101 that we found to negatively regulate egress of VP40 and Z VLPs (30-33). Here, we describe the  
102 identification of host WW Domain Containing Oxidoreductase (WWOX) as the newest member of this  
103 emerging list of PPxY-interactors that negatively regulate viral PPxY-mediated budding. Indeed, we  
104 demonstrate that WW-domain #1 of WWOX, a multi-functional tumor suppressor, specifically  
105 interacts with the PPxY motifs of eVP40, mVP40, and LASV Z proteins to inhibit VLP egress. Our  
106 identification of WWOX as the newest negative regulator of viral PPxY-mediated budding is  
107 particularly intriguing since like YAP/TAZ and BAG3, WWOX plays a key role in regulating  
108 physiologically important cellular pathways, such as transcription (Hippo pathway), apoptosis,  
109 cytoskeletal dynamics, and tight junctions (TJ) formation, via PPxY/WW-domain interactions (34-44).  
110 Notably, a robust interacting partner of WWOX, YAP and BAG3, is Angiomotin (AMOT) (38, 45-47), a  
111 multi-PPxY containing protein that functions as a “master regulator” of Hippo pathway (YAP/TAZ)  
112 signaling, cytoskeletal dynamics, cell migration/proliferation, and TJ integrity (45, 46, 48-55). Since  
113 we have demonstrated recently that expression of endogenous AMOT is critical for positively  
114 regulating budding of VLPs, as well as egress and spread of live EBOV and MARV in cell culture (32,  
115 33), we postulated that the competitive interplay among VP40/Z-AMOT-WWOX may contribute  
116 mechanistically to regulation of VLP and virus egress. Indeed, we found that eVP40 and mVP40  
117 proteins were localized away from the site of budding at the plasma membrane in the presence of  
118 WWOX. In addition, we found that Amotp130, but not PPxY-lacking Amotp80, could rescue budding  
119 of VP40 VLPs and live virus from the inhibitory effect of WWOX. In sum, our findings here identify  
120 host WWOX as a novel PPxY interactor with VP40 and Z proteins, and suggest that modular mimicry  
121 between viral and host PPxY motifs (AMOT) and the competitive nature of their binding to the same

122 WW-domain interactor (WVOX) impacts late stages of the virus lifecycle, and perhaps cellular  
123 processes as well.

## 125 **Results**

### 126 Identification of WVOX as a WW-domain interactor with VP40 and Z matrix proteins.

127 The PPxY L-domain motif is conserved in eVP40, mVP40, and LASV Z matrix proteins (Fig. 1A),  
128 where it plays key roles in mediating host interactions and regulating virus egress. We used  
129 biotinylated WT or PPxY mutant peptides from not only eVP40, but also mVP40, and LASV Z to  
130 screen an array of mammalian WW-domains arranged in 14 squares (A-N), each containing a GST-  
131 alone control (M) and 12 duplicate samples of GST-WW-domain fusion proteins (1-12), to identify  
132 novel PPxY interactors (Fig. 1B). We identified a select set of specific WW-domain interactors for  
133 each of the WT peptides (Figs. 1C, 1D, and 1E); however, no WW-domain interactors were detected  
134 for any of the viral PPxY mutant peptides (data not shown). In addition to detecting many previously  
135 characterized and expected WW-domain interactors such as Nedd4, WWP1, and BAG3, we  
136 unexpectedly identified for the first time WW domain-containing oxidoreductase (WVOX) as a novel  
137 interactor with the PPxY motifs of mVP40 (Fig. 1D) and LASV Z (Fig. 1E), but not with the PPxY motif  
138 of eVP40 (Fig. 1C). Interestingly, WVOX is multi-functional tumor suppressor that plays key roles in  
139 regulating physiologically important cellular pathways, such as transcription (Hippo pathway),  
140 apoptosis, cytoskeletal dynamics, and tight junction (TJ) formation, via host PPxY/WW-domain  
141 interactions(35, 37, 38, 40, 42, 56). These results not only warrant further investigations into a  
142 possible role for host WVOX as a viral PPxY interactor and effector of viral egress, but also highlight  
143 the selectivity, context specificity, and the potential competitive interplay of these modular PPxY/WW-  
144 domain interactions.

### 146 GST-pulldown assays confirm VP40/Z – WVOX interactions.

147 WWOX contains two WW-domains separated by a nuclear localization signal, and followed by a  
148 short chain dehydrogenase (SDR) domain (Fig. 2A). WW domain #1 (WW1) has the typical domain  
149 structure and is the main functional domain known to mediate multiple interactions with host PPxY  
150 containing proteins. In contrast, WW domain #2 (WW2) has an atypical structure due to the  
151 substitution of one of its signature tryptophan (W) residues by a tyrosine (Y) residue, such that WW  
152 domain #2 functions as a chaperone to facilitate PPxY ligands binding to WW domain #1(57). Here,  
153 we used purified GST fusion proteins of WW1 and WW2 (Fig. 2B) in pulldown assays to determine  
154 whether they interact with PPxY motifs present in full-length eVP40, mVP40 and LASV-Z proteins  
155 expressed in HEK293T cells (Figs. 2C-E). Briefly, cell lysates from HEK293T cells expressing either  
156 WT or PPxY mutant viral proteins were incubated with GST alone, GST-WW1, or GST-WW2, and  
157 viral interactors were detected by Western blotting. We found that WT eVP40, mVP40, and LASV Z  
158 proteins interacted with the WW1 domain of WWOX (Figs. 2C-E, lanes 3), but not with the WW2  
159 domain (Figs. 2C-E, lanes 5). The PPxY mutant proteins did not interact with either WW1 or WW2.  
160 Interestingly, our results using this approach show that full-length WT eVP40 interacted with WW1  
161 domain of WWOX, although an interaction between the eVP40 WT peptide and WW1 domain of  
162 WWOX was not detected in the array screen (Fig. 1).

#### 163 164 Co-immunoprecipitation to confirm that full-length VP40/Z and WWOX interact.

165 Here, we used a co-immunoprecipitation approach to determine whether VP40/Z proteins interact  
166 with full length WWOX protein in mammalian cells. HEK293T cells were co-transfected with WWOX  
167 alone or WWOX plus WT or PPxY mutant forms of VP40/Z, and cell extracts were  
168 immunoprecipitated with nonspecific IgG or antisera to detect VP40/Z proteins (Fig. 3). We observed  
169 that WWOX interacted robustly with WT eVP40 (Fig. 3A, lane 6) and WT mVP40 (Fig. 3B, lane 6), but  
170 did not interact strongly with either VP40 PPxY mutant (Figs. 3A and 3B, lanes 5). Since our anti-Z  
171 antiserum is most efficient in detecting LASV Z by Western blotting, we used anti-WWOX antiserum

172 first for immunoprecipitation, followed by anti-Z antiserum (Fig. 3C). Indeed, we detected an  
173 interaction between WWOX and WT LASV Z (Fig. 3C, lane 6), but not with the PPxY mutant of Z (Fig.  
174 3C, lane 5).

175 We next sought to determine whether VP40/Z interact with endogenous WWOX. Human MCF7  
176 cells were either mock transfected or transfected with WT eVP40, mVP40, and LASV Z, and cell  
177 extracts were immunoprecipitated with either non-specific IgG as a negative control, the appropriate  
178 anti-VP40/Z antisera followed by Western blotting with anti-WWOX antiserum, or the appropriate anti-  
179 VP40/Z antisera followed by Western blotting with the same anti-VP40/Z antisera as a positive control  
180 (Fig. 4). Endogenous WWOX was detected in precipitates from cells expressing eVP40 (Fig. 4A, lane  
181 3), mVP40 (Fig. 4B, lane 3), and LASV Z (Fig. 4C, lane 3), but not in mock-transfected cells (Fig. 4,  
182 lanes 2 ) or in IgG controls (Fig. 4A, lanes 1). Taken together, these results show that full-length  
183 eVP40, mVP40 and LASV-Z interacted with exogenous and endogenous full length WWOX.

#### 184 WWOX inhibits filovirus and arenavirus VLP egress.

185  
186 Next, we asked whether expression of WWOX would affect egress of VP40/Z using our well-  
187 established VLP budding assay. Briefly, HEK293T cells were transfected with WT or PPxY mutant  
188 forms of VP40/Z in the absence or presence of exogenous WWOX, and both cell extracts and VLPs  
189 were harvested at 24 hours post transfection. VP40/Z and WWOX proteins were detected in the  
190 appropriate cell extracts by Western blotting, and actin was also detected as a loading control (Figs.  
191 5A, 5B, and 5C, cell lysates). Interestingly, we found that expression of WWOX inhibited egress of  
192 eVP40, mVP40, and LASV Z VLPs (Figs. 5A, 5B, and 5C, compare lanes 1 and 2 in each panel). As  
193 expected, the PPxY mutant VP40/Z proteins were themselves defective in VLP budding in the  
194 absence and presence of WWOX (Figs. 5A, 5B, and 5C, compares lanes 3 and 4 in each panel).

195 To determine whether the inhibitory effect of WWOX on VLP egress was dose-dependent,  
196 HEK293T cells were transfected with a constant amount of VP40/Z and increasing amounts of

197 WWOX (Fig.6). We observed a robust and consistent dose-dependent inhibitory effect of WWOX on  
198 egress of eVP40 (Figs. 6A + 6B), mVP40 (Figs. 6C + 6D) and LASV-Z (Figs. 6E + 6F) VLPs in  
199 multiple independent experiments. Indeed, budding of eVP40 and mVP40 VLPs was reduced by  
200 approximately 80% when equal amounts of VP40 and WWOX plasmids were co-transfected (Figs. 6B  
201 and 6D). Interestingly, inhibition of LASV Z VLP budding was as pronounced as 80% in the presence  
202 of only half of the amount of WWOX plasmid as used for VP40 experiments (Figs. 6E and 6F).  
203 Together, our results indicate that WWOX is a novel, broad-spectrum PPxY interactor that negatively  
204 regulates egress of VP40/Z VLPs.

### 206 WW-domain #1 of WWOX interacts physically and functionally with VP40/Z proteins.

207 We next sought to determine whether WW-domain #1 (WW1) of WWOX specifically was important  
208 for mediating physical and functional interactions between WWOX and viral PPxY motifs, since WW1,  
209 but not WW2 of WWOX bound to full length eVP40/mVP40 and LASV-Z in our GST-pulldown assays.  
210 Toward this end, we constructed a WW1 domain mutant of WWOX (WWOX-W44AP47A) by mutating  
211 two key amino acids within the domain to alanine: W44A and P47A [57]. HEK293T cells were co-  
212 transfected with myc-tagged WWOX WT or W44AP47A mutant plus eVP40 (Fig.7A), mVP40 (Fig.7C)  
213 or LASV-Z (Fig.7E). Cell extracts were immunoprecipitated with either non-specific IgG or anti-myc  
214 antibody, and the VP40 and Z proteins were detected in precipitates by Western blotting using  
215 appropriate antisera as indicated (Figs. 7A+7C+7E). eVP40, mVP40 and LASV-Z were detected in  
216 the WWOX WT precipitates, but not in the W44AP47A mutant precipitates (Figs. 7A+7C+7E, lanes 3  
217 and 4), confirming that WWOX-VP40/Z interactions are mediated by the WW1 domain.

218 Next, we sought to determine whether the mutation of WW1 would affect the ability of WWOX to  
219 inhibit VP40/Z VLP egress. Briefly, HEK293T cells were transfected with VP40/Z alone, or in  
220 combination with either WWOX WT or W44AP47A mutant. Cell extracts and VLPs were harvested at  
221 24 hours post-transfection. While all proteins were detected at equivalent levels in cell extracts (Figs.

7B+7D+7F, Cell lysate), a significant decrease in egress of both VP40 and Z VLPs was observed in cells co-expressing WWOX-WT (Figs. 7B+7D+7F, VLP, lanes 1 and 2). In contrast, co-expression of the W44AP47A mutant did not affect VP40/Z VLP egress compared to controls (Figs. 7B+7D+7F, VLP, lanes 2 and 3). Together, these results show that WW1 of WWOX not only is crucial for mediating the WWOX-VP40/Z physical interactions, but also for mediating the inhibitory effect on VP40/Z VLP budding.

### siRNA knockdown of endogenous WWOX enhances VP40/Z VLP egress.

Since over-expression of WWOX had a negative regulatory effect on egress of VP40/Z VLPs, we reasoned that knockdown of endogenous levels of WWOX may have an opposite positive regulatory effect on VP40/Z VLP egress. To test this, we used an siRNA approach to knockdown expression of endogenous WWOX in the human Huh-7 liver cells, and evaluated its effect on VP40/Z VLP egress. Random or WWOX-specific siRNAs plus eVP40, mVP40 or LASV-Z plasmids were transfected into Huh-7 cells, and cell extracts and VLPs were harvested and analyzed by Western blotting (Fig. 8). As expected, WWOX-specific siRNAs, but not random siRNAs, knocked down expression of endogenous WWOX by >70% (Figs. 8A-C, cell lysate). Importantly, we observed a consistent 2.5-4 fold increase in VP40/Z VLP levels in the presence of WWOX-specific siRNAs compared to that in the presence of random control siRNAs over three independent experiments (Figs. 8A-C, VLP; 8D). These results support our conclusion that newly identified PPxY interactor, WWOX, represents the newest member of an emerging list of negative regulators of VP40/Z VLP budding.

### WWOX alters the intracellular and membrane localization patterns of VP40.

To begin to address the mechanism by which WWOX inhibits VLP egress, we sought to determine whether WWOX affects the intracellular localization patterns of VP40. HEK293T cells were transfected with either eVP40 or mVP40 alone, or with WWOX, and the intracellular patterns of



247 expression of VP40 and WWOX were visualized by confocal microscopy. As we've observed  
248 previously, expression of eVP40 or mVP40 alone results in their abundant localization at the plasma  
249 membrane (PM) in the form of membrane projections as a result of VLP formation and subsequent  
250 egress (Figs. 9A and 9B, top rows). However, this typical PM pattern of localization for VP40 was  
251 altered in the presence of WWOX, such that VP40 exhibited a more internal and punctate pattern of  
252 expression with fewer distinct PM projections (Figs. 9A and 9B). In addition to a reduced amount of  
253 VP40 at the PM in the presence of WWOX, we also observed what appeared to be a low level of  
254 VP40 in the nucleus along with WWOX (Figs. 9A and 9B). To further assess the altered distribution  
255 pattern for VP40 in the presence of WWOX, we isolated cytosol, nuclear, and plasma membrane  
256 fractions from cells expressing either VP40 alone or VP40 + WWOX, and quantified the proteins by  
257 Western blotting (Figs. 9C and 9D).  $\beta$ -actin, Lamin-A/C and NA/K ATPase served as markers for the  
258 cytosol, nuclear and PM fractions, respectively. Consistent with the confocal imaging observations,  
259 we observed that the levels of eVP40 and mVP40 were reduced in the PM fractions in cells co-  
260 expressing WWOX compared to control cells (Figs. 9C and 9D, plasma membrane). We did not  
261 observe any difference in VP40 expression levels in the cytosol fractions from WWOX positive vs.  
262 negative cells (Figs. 9C and 9D, cytosol); however, we did observe approximately a 2-fold increase in  
263 VP40 levels in the nucleus of cells expressing WWOX compared to those expressing VP40 alone  
264 (Figs. 9C and 9D, nucleus). This finding does correlate well with some of the confocal images  
265 showing that VP40 (particularly mVP40) is prevalent in the nucleus in WWOX-expressing cells (Fig.  
266 9B, bottom row). Taken together, these results suggest that WWOX may inhibit egress of VP40 VLPs,  
267 in part, by relocating VP40 away from the site of budding at the PM, as well as perhaps chaperoning  
268 a portion of VP40 into the nucleus.

269  
270 AMOT counteracts the inhibitory effect of WWOX and rescues budding of VP40 VLPs and live virus.

271 We have demonstrated recently that multi-PPxY containing protein Angiomotin (Amotp130)  
272 positively regulates budding of eVP40 and mVP40 VLPs, as well as egress and spread of live EBOV  
273 and MARV in cell culture (32, 33). Intriguingly, the PPxY motifs of Amotp130 interact with WW-  
274 domains of negative regulators of VP40 budding (YAP, BAG3, and WWOX)(38, 45-47), as well as  
275 with WW-domains of positive regulators of VP40 budding (Nedd4 and Itch) (58). Amot also functions  
276 as a master regulator of several physiologically relevant pathways/processes, including the Hippo  
277 pathway, apoptosis, cytoskeletal organization at the PM, and tight junction (TJ) integrity (45, 46, 48-  
278 50, 52-55). Thus, a potential role for Amot as a central and key regulator of PPxY-mediated egress of  
279 RNA viruses warrants further investigation.

280 Toward that end, we sought to determine whether the interplay between PPxY-containing  
281 Amotp130 (positive regulator of VP40 budding) and WW-domain containing WWOX (negative  
282 regulator of VP40 budding) will influence egress of VP40 VLPs. We first utilized a structure-based  
283 docking approach to assess the binding potential of the PPxY motifs from eVP40, mVP40, and  
284 Amotp130 to interact with the WW1 domain of WWOX (Fig. 10A). Using Schrödinger's peptide  
285 docking module, we showed that the P1 pocket of WW1 of WWOX (Fig. 10A-C, white module)  
286 formed by T27 and W29 (Fig. 10A-C, pink) interacts with Proline(P)-1 residue of the PPxY motif (Fig.  
287 10A-C, highlighted Proline in the green peptide). The Y sidechain of the PPxY motif (Fig. 10A-C,  
288 highlighted Tyrosine in the green peptide) occupies the Y pocket of WW1 domain which is a  
289 hydrophobic groove consisting of sidechains from A20, H22 and T27 (Fig. 10A-C, pink). Importantly,  
290 the analysis of the protein-peptide docking scores revealed that PPxY motif #2 of Amotp130 has the  
291 highest potential (the best docking score -97.66) to bind to WW1, followed by the mVP40 PPxY motif  
292 (-79.20), and then the eVP40 PPxY motif (-71.11) (Figs. 10A-C).

293 To determine whether Amot could rescue budding of VP40 VLPs in the presence of WWOX,  
294 HEK293T cells were transfected with the indicated combinations of plasmids (Figs. 10D-H), and  
295 proteins were detected by Western blotting of both cell extracts and VLPs at 24 hours post-



transfection. Consistent with previous results, we found that expression of Amotp130 alone did not negatively affect egress of eVP40 (Fig. 10D, compare lanes 1 and 2) or mVP40 (Fig. 10F, compare lanes 1 and 2) VLPs; however, expression of WWOX significantly inhibited egress of both VP40 VLPs (Figs. 10D and 10F, compare lanes 1 and 3). Interestingly, co-expression of Amotp130 overcame the inhibitory activity of WWOX and rescued egress of both eVP40 and mVP40 VLPs back to WT levels (Figs. 10D and 10F, lanes 4 and 5). The ability of Amotp130 to rescue VP40 VLP egress was dependent on its PPxY motifs, since Amotp80, which lacks all PPxY motifs (Fig. 10H), did not rescue budding of VP40 VLPs (Figs. 10D and 10F, lanes 6). These results were reproducible and significant in repeated independent experiments (Figs. 10E and 10G).

Lastly, we sought to determine whether expression of WWOX would impair PPxY-mediated egress of virus, and also whether the interplay among the WWOX-Amot-viral PPxY motifs regulates the release of virus. Here, we used our previously described VSV recombinant virus M40 (VSV-M40) which contains the PTAPPEY L-domain motifs and flanking residues from eVP40 in place of the PPxY L-domain motif and flanking residues of VSV M protein (15). Briefly, HEK293T cells were first transfected with vector alone, WWOX, or WWOX plus Amotp130 or Amotp80, and then infected with VSV-M40 at a MOI of 0.1 for 8 hours. Cell extracts and supernatants were harvested for Western blot analysis and virus titration, respectively (Fig. 11). Notably, virus titers were significantly lower in the presence of WWOX compared to control (Fig. 11A). Similar to our observations with VP40 VLPs, virus titers were rescued back to control levels when Amotp130, but not Amotp80, was co-expressed with WWOX (Fig. 11A). Expression of viral and host proteins in all samples were confirmed by Western blotting (Fig. 11B). Taken together, these data demonstrate that the competitive interplay among WWOX-AMOT-VP40 PPxY motif not only regulates VLP egress, but also egress of recombinant virus VSV-M40.

## **Discussion**

321 WWOX was originally discovered as a tumor suppressor which exerts proapoptotic and inhibitory  
322 functions on a variety of tumors (59), and WWOX has been linked to the micropathology of some  
323 oncogenic viruses, such as EBV and HTLV-I (60-62). WWOX has an extensive and diverse  
324 interactome that includes an array of PPxY-containing proteins such as AMOT, p73, AP-2 $\gamma$ , ErbB-4,  
325 ezrin, TMEM207, SMAD3, and VOPP1, and as such, WWOX plays a key role in regulating several  
326 physiologically important cellular pathways, such as transcription (Hippo pathway), apoptosis, cellular  
327 respiration, cytoskeletal dynamics, and tight junction (TJ) formation via PPxY/WW-domain  
328 interactions (34, 37, 38, 40, 41, 51, 63-67). Here, we report on the identification of host WWOX as a  
329 novel WW-domain containing interactor with the PPxY motifs of eVP40, mVP40, and LASV-Z matrix  
330 proteins leading to negative regulation of VP40/Z VLP egress. Although mainly a cytoplasmic protein,  
331 WWOX does interact with several transcription factors and can shuttle in and out of the nucleus (35-  
332 40, 64, 67). Interestingly, we found that expression of WWOX correlated with modestly increased  
333 levels of VP40 detected in the nucleus. This finding not only raises the possibility that WWOX-  
334 mediated shuttling of a portion of VP40 into the nucleus could contribute to its negative effect on  
335 VP40 VLP egress by reducing the amount of VP40 at the plasma membrane, but also that  
336 competitive PPxY/WW-domain interactions among WWOX, VP40, and cellular transcription factors  
337 could affect the biology and pathogenesis of the virus. For example, EBOV infection upregulates  
338 transforming growth factor  $\beta$  (TGF- $\beta$ ) signaling, and effectors of TGF- $\beta$  signaling, such as PPxY-  
339 containing SMAD3, are activated leading to epithelium-to-mesenchyme-like transition (EMT).  
340 Reduced expression of cell adhesion molecules and loss of epithelial cell integrity enhanced EBOV  
341 pathogenesis (68). Interestingly, WWOX engages in TGF- $\beta$  signaling (69, 70) and directly binding to  
342 the SMAD3 PPxY motif, sequestering SMAD3 in the cytoplasm, and thus inhibiting TGF- $\beta$  signaling-  
343 SMAD3 transcriptional activity (65). Indeed, downregulation of WWOX induces EMT, decreases cell  
344 attachment, and increases cell motility (71). It will be of interest to determine whether WWOX-VP40  
345 interactions disrupt WWOX function and induce EMT during live EBOV infection.

346 WWOX is the newest addition to an emerging list of functionally-related, host WW-domain  
347 interactors (e.g. BAG3 and YAP) that negatively regulate VP40/Z PPxY-mediated budding (30-33).  
348 This growing trend suggests that there may be a complex interplay of a wide array of virus-host  
349 PPxY/WW-domain interactions occurring during virus infection, and the potential consequent impact  
350 of these virus-host interactions on endogenous host PPxY/WW-domain interactions may impact the  
351 biology of both the virus and the host during infection. Similar to our findings for negative regulators of  
352 budding, BAG3 and YAP-1, WWOX alters the intracellular localization pattern of VP40. Indeed, we  
353 not only observed a decrease in localization of VP40 at the PM, but also observed more punctate and  
354 disorganized staining of VP40 that remained at the PM in shortened protrusions. Thus, the  
355 mechanisms by which BAG3, YAP, and WWOX negatively regulate VP40 VLP egress likely involve,  
356 at least in part, disruption of VP40 localization and/or assembly at the site of budding at the PM via  
357 direct PPxY/WW-domain interactions and subsequent sequestration.

358 We recently revealed a key role for endogenous Amot in positively regulating egress and spread  
359 of PPxY-containing filoviruses (32, 33). Amotp130 contains multiple PPxY motifs that mediate  
360 interactions with WW-domains of YAP, BAG3, and WWOX (negative regulators of budding), and in  
361 doing so, function as a master regulator of several physiologically relevant pathways/processes,  
362 including transcription (Hippo pathway), actin polymerization, and tight junction (TJ)  
363 formation/integrity (45-54). Interestingly, stability and turnover of Amotp130 itself is tightly regulated  
364 by PPxY/WW-domain interactions with Nedd4 E3 ubiquitin ligase family members (positive regulators  
365 of budding) (58). Thus, the competitive interplay and modular mimicry between the PPxY motifs of  
366 AMOTp130, as well as PPxY-containing family members Amot-L1 and Amot-L2 (72, 73), and viral  
367 VP40/Z proteins for binding to positive or negative host WW-domain interactors, to regulate virus  
368 egress and dissemination as well as impact host pathways, is of keen interest. Here, we  
369 demonstrated that expression of Amotp130 rescued the inhibitory effect of WWOX on both VP40 VLP  
370 and live virus egress in a PPxY-dependent manner, whereas Amotp80, which lacks all PPxY motifs,

371 did not rescue VP40 VLP or virus egress. We speculate that the PPxY motifs of Amotp130 and VP40  
372 may compete for binding to WWOX in virus infected cells, and that the outcome of this virus-host  
373 competition will impact virus budding in either a positive or negative manner. In addition, this virus-  
374 host competition will likely have an impact on WWOX function and its interactome. For example, ezrin  
375 is a membrane-cytoskeleton linker protein that participates in cell adhesion, migration, and assembly  
376 of cellular junctions (74-77), and ezrin interacts with the WW-domain of WWOX via its PPVY motif  
377 (63). It will be of interest to determine whether filoviral PPxY motifs could disrupt endogenous  
378 WWOX-ezrin interactions resulting in altered membrane-cytoskeleton remodeling and/or cell junction  
379 formation and integrity, which could then influence virus spread and pathogenicity.

380 In sum, we have identified host WWOX as a WW-domain interactor with the PPxY motifs of  
381 eVP40, mVP40, and LASV-Z that negatively regulate egress of VP40/Z VLPs. The identification of  
382 WWOX as the newest negative regulator of viral PPxY-mediated budding is particularly intriguing due  
383 to its broad interactome and its regulatory role in several physiologically important pathways.  
384 Additional studies at the BSL2 and BSL4 levels will be needed to further dissect the complex  
385 molecular and modular interplay among viral PPxY motifs, host PPxY motifs (e.g., Amotp130), and  
386 host WW-domains from both positive (e.g. Nedd4, WWP1, Itch) and negative (e.g. WWOX, YAP,  
387 BAG3) regulators of virus egress, and assess the biological relevance of these virus-host interactions  
388 during live virus infection. Notably, WWOX and Amot family gene knockout mice are available and will  
389 provide valuable models to test the dynamics of these virus-host interactions *in vivo* and in cells  
390 derived from these animals (78-80).

## 392 **Materials and Methods**

### 393 **Cell lines and plasmids**

394 HEK293T, MCF-7, BHK-21 and Huh-7 cells were maintained in Dulbecco's modified Eagle's medium  
395 (DMEM) (CORNING) supplemented with 10% fetal bovine serum (FBS) (GIBCO), penicillin  
396 (100U/ml)/streptomycin (100µg/ml) (INVITROGEN) and the cells were grown at 37°C in a humidified  
397 5% CO<sub>2</sub> incubator. The plasmids encoding eVP40-WT, eVP40-ΔPT/PY and HA-eVP40-WT were  
398 described previously. Flag-tagged mVP40-WT and mVP40 P>A were kindly provided by S. Becker  
399 (Institut für Virologie, Marburg, Germany). LASV-Z WT, HA-LASV-Z WT were kindly provided by S.  
400 Urata (Nagasaki, Japan) and LASV-Z ΔPY were described previously (14). VP40 and Z proteins are  
401 expressed from the pCAGGS vector. The pCMV-myc-tagged WWOX plasmid was kindly provided by  
402 Rami I. Aqeilan (Jerusalem, Israel). The pCMV-myc-tagged WW1 domain mutant WWOX was  
403 constructed by mutating W44 and P47 to A (alanine). Plasmids expressing myc-tagged AMOT p130  
404 and p80 were kindly provided by D. McCollum (UMass Medical School, MA).

#### 405 WW domain array screens.

406 The proline rich motif "reading" array consists of approximately 115 WW- and SH3-domains from  
407 mammalian proteins (and yeast). We prepared biotinylated peptides harboring WT or mutated PPxY  
408 motifs from EBOV VP40 WT (MRRVILPTAPPEYMEAI) or mutant (MRRVILPTAAAEAMEAI), MARV  
409 VP40 WT (MQYLNPPPYADHGANQL) or mutant (MQYLNAAAPAADHGANQL) and LASV-Z WT  
410 (TAPPEIPPSQNPPPYSP) or mutant (TAPPEIPPSQNAAPASP). All of the peptides were  
411 fluorescently labeled and used to screen the specially prepared "proline-rich" reading array as  
412 described previously [32].

#### 413 GST-pulldown assay

414 GST alone and GST-tagged WWOX WW1 and WW2 domains fusion protein were expressed in BL-  
415 21 cells and subsequently purified and conjugated to glutathione (GSH) beads (GE HEALTHCARE).  
416 HEK293T cells were transfected with eVP40-WT, eVP40-ΔPT/PY or flag-tagged mVP40 WT, mVP40  
417 P>A or LASV-Z WT, LASV-Z ΔPY, respectively. At 24 hours after transfection, the cell extracts were  
418 incubated with the GSH beads described above at 4°C for 6 hours with continuous rotating. The

419 protein complexes were pulled down with beads and subjected to Western blot analysis. The rabbit  
420 eVP40 antiserum (IBT Bioservices), mouse anti-flag antibody (Fitzgerald) and rabbit LASV-Z  
421 antiserum (IBT Bioservices) were used to detect the eVP40, mVP40, LASV-Z and their PPxY mutants,  
422 respectively. The mouse anti-GST antibody (Sigma) was used to detect the GST, or GST-WWOX  
423 WW1 and WW2 fusion proteins.

#### 424 Immunoprecipitation assay

425 HEK293T cells seeded in 6 well plates were transfected with the indicated plasmid combinations  
426 using Lipofectamine reagent (INVITROGEN). At 24 hours post transfection, cells were harvested and  
427 lysed, and the cell extracts were subjected to Western blot analysis and co-immunoprecipitation. The  
428 protein complexes were precipitated by either rabbit or mouse IgG and appropriate antisera as  
429 indicated. First, the cell extracts were incubated with antisera overnight at 4°C with continuous  
430 rotation, and then the protein A/G agarose beads (Santa Cruz) were added to the mixtures and  
431 incubated for 5 hours with continuous rotation. After incubation, beads were collected via  
432 centrifugation and washed 5 times. The input cell extracts and immunoprecipitates were then  
433 detected by Western blotting with appropriate antisera as indicated. The antisera used includes:  
434 rabbit anti-eVP40, mouse anti-flag(for flag-tagged mVP40), rabbit anti-LASV-Z antisera, and mouse  
435 anti-myc (Millipore), rabbit anti-myc (Sigma) antisera, mouse anti-HA antibody (Sigma), rabbit anti-  
436 WWOX (Cell Signaling Technology) and mouse anti-WWOX (Santa Cruz) antisera.

#### 437 VLP budding assay and WWOX titration

438 Filovirus VP40 and arenavirus LASV-Z VLP budding assays in HEK293T cells were described  
439 previously (14). The eVP40, mVP40 and LASV-Z proteins in VLPs and cell extracts were detected by  
440 SDS-PAGE and Western blotting and quantified using NIH Image-J software. The anti-eVP40  
441 antiserum was used to detect eVP40-WT and eVP40- $\Delta$ PT/PY mutant, the anti-flag monoclonal  
442 antibody was used to detect flag-tagged mVP40 and mVP40 P>A, and the anti LASV-Z antiserum  
443 was used to detected LASV-Z and LASV-Z  $\Delta$ PY. For VLP budding and WWOX titration experiments,



444 HEK293T cells were transfected with 0.1µg of eVP40 or mVP40, or 0.2µg of LASV-Z and increasing  
445 amounts (0.1, 0.5, 1.0µg) of WWOX plasmids. The total amounts of transfected DNA were equivalent  
446 in all samples. The cell extracts and VLPs were harvested at 24 hours post transfection and  
447 subjected to Western blotting.

#### 448 siRNA knockdown assay

449 Huh-7 cells seeded in 6 well plates were transfected with human WWOX-specific or random siRNAs  
450 (DHARMACON) at a final concentration of 50nM per well using Lipofectamine 2000 reagent  
451 (INVITROGEN). At 24 hours post siRNA transfection, cells were transfected again with 1.0µg of  
452 eVP40, mVP40 or LASV-Z plasmid. VLPs and cell extracts were harvested at 48 hours post  
453 transfection, and the indicated proteins in cell extracts and VLPs were detected by Western blotting.

#### 454 Indirect Immunofluorescence assay

455 HEK293T cells were transfected with the indicated plasmid combinations. At 24 hours post  
456 transfection, cells were washed with cold PBS and fixed with 4% formaldehyde for 15 min at room  
457 temperature, then permeabilized with 0.2% Triton X-100. After washing 3X with cold PBS, cells were  
458 incubated with rabbit anti-eVP40 or anti-flag (mVP40) antiserum and mouse anti-myc (WWOX)  
459 antibody. Cells were stained with Alexa Fluor 488 goat anti-rabbit and 594 goat anti-mouse  
460 secondary antibodies (Life Technologies). Cell nuclei were stained with DAPI in Prolong anti-fade  
461 mountant (Thermofisher scientific). Microscopy was performed using a Leica SP5 FLIM inverted  
462 confocal microscope. Serial optical planes of focus were taken, and the collected images were  
463 merged into one by using the Leica microsystems (LAS AF) software.

#### 464 Cytosol, nucleus and plasma membrane protein fractionation

465 HEK293T cells were transfected with the indicated plasmid combinations, and cells were scraped and  
466 washed with cold PBS at 24 hours post transfection. Cells were then collected via low speed  
467 centrifugation. The cytosol, nucleus and plasma membrane fractions were isolated sequentially using  
468 the “Minute plasma membrane protein isolation kit” (INVENT) following the manufacturer's

instructions. Proteins within the cytosol, nucleus and plasma membrane fractions were detected via SDS-PAGE and Western blotting. The  $\beta$ -actin, lamin A/C and sodium potassium ATPase were used as a cytosol, nuclear and plasma membrane controls, respectively and were detected using mouse anti  $\beta$ -actin (Proteintech), mouse anti lamin A/C (Cell Signaling Technology) and rabbit anti Na/K ATPase (Abcam) monoclonal antibodies. The eVP40, mVP40 and WWOX in each subcellular fraction were detected using antisera as that mentioned above.

### Protein-peptide docking analysis

#### *Homology modelling*

The amino acid sequence of WWOX WW1 domain was obtained from the uniprot database (81) (position 16-49, Q9NZC7). A sequence similarity search was carried out using Protein BLAST tool (82) to find protein templates. ClustalW2 (83) was used to generate the target-template sequence alignment. The homology modeling of the WWOX WW1 domain was employed by Modeller9.22, based on the template-Ubiquitin ligase NEDD4 (PDB ID: 1I5H) (84), which is the closest template to WWOX WW1 domain with 64% sequence identity. DOPE (85) scoring function was then used to score the models and pick the best scoring model for peptide docking.

#### *Protein-peptide docking*

The protein-peptide docking analysis was carried out using Glide module. The modelled WW1 domain of WWOX was prepared using Protein Preparation Wizard tool in Schrodinger. The peptides were constructed with Maestro and multiple conformers were generated using MacroModel sampling method. The receptor grid for peptide docking purposes was generated with default settings and centroid of the Y18, A20, H22, E25, T27 and W29 residues defined as grid center. The Glide SP-PEP protocol was used to dock peptide conformers (86).

### AMOT mediated rescue of VLP budding

HEK293T cells were transfected with 0.2 $\mu$ g of eVP40 or mVP40 plus with 0.5 $\mu$ g of WWOX and increasing amounts (0.25, 0.5 $\mu$ g) of AMOTp130 or 0.5 $\mu$ g AMOTp80 plasmids. The total amounts of



transfected DNA were equivalent in all samples. VLPs and cell extracts were harvested at 24 hours post transfection and then subjected to SDS PAGE and Western blot analysis and quantified using NIH Image-J software.

### Transfection/Infection assays

HEK293T cells were first transfected with pCAGGS vector alone, WWOX (1.0 $\mu$ g) or WWOX (1.0 $\mu$ g) plus AMOTp130 (0.5 $\mu$ g) or AMOTp80 (0.5 $\mu$ g) for 24 hours, and subsequently infected with VSV-M40 at a MOI of 0.1. Supernatants and cell extracts were harvested at 8 hours post-infection, separately. Released VSV-M40 virions in supernatants were titrated in duplicate via standard plaque assay on BHK-21 cells. Cellular and viral proteins were detected by Western blotting using appropriate antibodies.

### Acknowledgements

The authors would like to thank S. Becker, S. Urata, R. I. Aqeilan, D. McCollum, and J. Kissil for kindly providing reagents. The authors would like to thank members of the Harty lab for fruitful discussions and suggestions on this work.

### Funding Statement

Funding was provided in part by National Institutes of Health grants AI138052, AI139392, and EY031465 to RNH. Probing of arrayed WW-domains was made possible via the UT MDACC Protein Array & Analysis Core (PAAC) CPRIT Grant RP180804 to MTB. HF and CKJ were supported by Biomedical Research Council of Agency for Science, Technology and Research (A\*STAR). The funders had no role in study design, data collection and analysis, decision to publish, or preparation of the manuscript.

519 **Data Availability**

520 All relevant data are within the manuscript.

521

522 **Conflict of Interest**

523 MTB is a co-founder of EpiCypher.

524

525

526

527 **References**

- 528 1. Salvato MS. 2017. Hemorrhagic Fever Viruses: Methods and Protocols. Springer New York.
- 529 2. Kuhn JH, Adachi T, Adhikari NKJ, Arribas JR, Bah IE, Bausch DG, Bhadelia N, Borchert M,  
530 Brantsaeter AB, Brett-Major DM, Burgess TH, Chertow DS, Chute CG, Cieslak TJ,  
531 Colebunders R, Crozier I, Davey RT, de Clerck H, Delgado R, Evans L, Fallah M, Fischer WA,  
532 2nd, Fletcher TE, Fowler RA, Grunewald T, Hall A, Hewlett A, Hoepelman AIM, Houlihan CF,  
533 Ippolito G, Jacob ST, Jacobs M, Jakob R, Jacqueroz FA, Kaiser L, Kalil AC, Kamara RF,  
534 Kapetshi J, Klenk HD, Kobinger G, Kortepeter MG, Kraft CS, Kratz T, Bosa HSK, Lado M,  
535 Lamontagne F, Lane HC, Lobel L, Lutwama J, Lyon GM, 3rd. 2019. New filovirus disease  
536 classification and nomenclature. *Nat Rev Microbiol* 17:261-263.
- 537 3. Sweileh WM. 2017. Global research trends of World Health Organization's top eight emerging  
538 pathogens. *Global Health* 13:9.
- 539 4. Malvy D, McElroy AK, de Clerck H, Günther S, van Griensven J. 2019. Ebola virus disease.  
540 *The Lancet* 393:936-948.
- 541 5. Boisen ML, Uyigue E, Aiyepada J, Siddle KJ, Oestereich L, Nelson DKS, Bush DJ, Rowland  
542 MM, Heinrich ML, Eromon P, Kayode AT, Odia I, Adomeh DI, Muoebonam EB, Akhilomen P,

- 543 Okonofua G, Osiemi B, Omoregie O, Airende M, Agbukor J, Ehikhametalor S, Aire CO,  
544 Duraffour S, Pahlmann M, Bohm W, Barnes KG, Mehta S, Momoh M, Sandi JD, Goba A,  
545 Folarin OA, Ogbaini-Emovan E, Asogun DA, Tobin EA, Akpede GO, Okogbenin SA, Okokhere  
546 PO, Grant DS, Schieffelin JS, Sabeti PC, Gunther S, Happi CT, Branco LM, Garry RF. 2020.  
547 Field evaluation of a Pan-Lassa rapid diagnostic test during the 2018 Nigerian Lassa fever  
548 outbreak. *Sci Rep* 10:8724.
- 549 6. Nyakarahuka L, Shoemaker TR, Balinandi S, Chemos G, Kwesiga B, Mulei S, Kyondo J,  
550 Tumusiime A, Kofman A, Masiira B, Whitmer S, Brown S, Cannon D, Chiang CF, Graziano J,  
551 Morales-Betoulle M, Patel K, Zufan S, Komakech I, Natseri N, Chepkwurai PM, Lubwama B,  
552 Okiria J, Kayiwa J, Nkonwa IH, Eyu P, Nakiire L, Okarikod EC, Cheptoyek L, Wangila BE,  
553 Wanje M, Tusiime P, Bulage L, Mwebesa HG, Ario AR, Makumbi I, Nakinsige A, Muruta A,  
554 Nanyunja M, Homsy J, Zhu BP, Nelson L, Kaleebu P, Rollin PE, Nichol ST, Klena JD,  
555 Lutwama JJ. 2019. Marburg virus disease outbreak in Kween District Uganda, 2017:  
556 Epidemiological and laboratory findings. *PLoS Negl Trop Dis* 13:e0007257.
- 557 7. Kolesnikova L, Ryabchikova E, Shestopalov A, Becker S. 2007. Basolateral budding of  
558 Marburg virus: VP40 retargets viral glycoprotein GP to the basolateral surface. *J Infect Dis* 196  
559 Suppl 2:S232-6.
- 560 8. Kolesnikova L, Bugany H, Klenk HD, Becker S. 2002. VP40, the matrix protein of Marburg  
561 virus, is associated with membranes of the late endosomal compartment. *J Virol* 76:1825-38.
- 562 9. Capul AA, de la Torre JC, Buchmeier MJ. 2011. Conserved residues in Lassa fever virus Z  
563 protein modulate viral infectivity at the level of the ribonucleoprotein. *J Virol* 85:3172-8.
- 564 10. Ziegler CM, Eisenhauer P, Manuelyan I, Weir ME, Bruce EA, Ballif BA, Botten J. 2018. Host-  
565 Driven Phosphorylation Appears to Regulate the Budding Activity of the Lassa Virus Matrix  
566 Protein. *Pathogens* 7.

- 567 11. Harty RN, Schmitt AP, Bouamr F, Lopez CB, Krummenacher C. 2011. Virus budding/host  
568 interactions. *Adv Virol* 2011:963192.
- 569 12. Harty RN. 2018. Hemorrhagic Fever Virus Budding Studies. *Methods Mol Biol* 1604:209-215.
- 570 13. Harty RN. 2009. No exit: targeting the budding process to inhibit filovirus replication. *Antiviral*  
571 *Res* 81:189-97.
- 572 14. Han Z, Madara JJ, Herbert A, Prugar LI, Ruthel G, Lu J, Liu Y, Liu W, Liu X, Wrobel JE, Reitz  
573 AB, Dye JM, Harty RN, Freedman BD. 2015. Calcium Regulation of Hemorrhagic Fever Virus  
574 Budding: Mechanistic Implications for Host-Oriented Therapeutic Intervention. *PLoS Pathog*  
575 11:e1005220.
- 576 15. Irie T, Licata JM, Harty RN. 2005. Functional characterization of Ebola virus L-domains using  
577 VSV recombinants. *Virology* 336:291-8.
- 578 16. Urata S, Noda T, Kawaoka Y, Morikawa S, Yokosawa H, Yasuda J. 2007. Interaction of  
579 Tsg101 with Marburg virus VP40 depends on the PPPY motif, but not the PT/SAP motif as in  
580 the case of Ebola virus, and Tsg101 plays a critical role in the budding of Marburg virus-like  
581 particles induced by VP40, NP, and GP. *J Virol* 81:4895-9.
- 582 17. Liu Y, Cocka L, Okumura A, Zhang YA, Sunyer JO, Harty RN. 2010. Conserved motifs within  
583 Ebola and Marburg virus VP40 proteins are important for stability, localization, and subsequent  
584 budding of virus-like particles. *J Virol* 84:2294-303.
- 585 18. Lu J, Qu Y, Liu Y, Jambusaria R, Han Z, Ruthel G, Freedman BD, Harty RN. 2013. Host  
586 IQGAP1 and Ebola virus VP40 interactions facilitate virus-like particle egress. *J Virol* 87:7777-  
587 80.
- 588 19. Han Z, Madara JJ, Liu Y, Liu W, Ruthel G, Freedman BD, Harty RN. 2015. ALIX Rescues  
589 Budding of a Double PTAP/PPEY L-Domain Deletion Mutant of Ebola VP40: A Role for ALIX in  
590 Ebola Virus Egress. *J Infect Dis* 212 Suppl 2:S138-45.

- 591 20. Licata JM, Simpson-Holley M, Wright NT, Han Z, Paragas J, Harty RN. 2003. Overlapping  
592 motifs (PTAP and PPEY) within the Ebola virus VP40 protein function independently as late  
593 budding domains: involvement of host proteins TSG101 and VPS-4. *J Virol* 77:1812-9.
- 594 21. Salah Z, Alian A, Aqeilan RI. 2012. WW domain-containing proteins: retrospectives and the  
595 future. *Front Biosci (Landmark Ed)* 17:331-48.
- 596 22. Chen HI, Sudol M. 1995. The WW domain of Yes-associated protein binds a proline-rich ligand  
597 that differs from the consensus established for Src homology 3-binding modules. *Proc Natl  
598 Acad Sci U S A* 92:7819-23.
- 599 23. Sudol M, Chen HI, Bougeret C, Einbond A, Bork P. 1995. Characterization of a novel protein-  
600 binding module--the WW domain. *FEBS Lett* 369:67-71.
- 601 24. Okumura A, Pitha PM, Harty RN. 2008. ISG15 inhibits Ebola VP40 VLP budding in an L-  
602 domain-dependent manner by blocking Nedd4 ligase activity. *Proc Natl Acad Sci U S A*  
603 105:3974-9.
- 604 25. Urata S, Yasuda J. 2010. Regulation of Marburg virus (MARV) budding by Nedd4.1: a different  
605 WW domain of Nedd4.1 is critical for binding to MARV and Ebola virus VP40. *J Gen Virol*  
606 91:228-34.
- 607 26. Han Z, Lu J, Liu Y, Davis B, Lee MS, Olson MA, Ruthel G, Freedman BD, Schnell MJ, Wrobel  
608 JE, Reitz AB, Harty RN. 2014. Small-molecule probes targeting the viral PPxY-host Nedd4  
609 interface block egress of a broad range of RNA viruses. *J Virol* 88:7294-306.
- 610 27. Han Z, Sagum CA, Bedford MT, Sidhu SS, Sudol M, Harty RN. 2016. ITCH E3 Ubiquitin  
611 Ligase Interacts with Ebola Virus VP40 To Regulate Budding. *J Virol* 90:9163-71.
- 612 28. Han Z, Sagum CA, Takizawa F, Ruthel G, Berry CT, Kong J, Sunyer JO, Freedman BD,  
613 Bedford MT, Sidhu SS, Sudol M, Harty RN. 2017. Ubiquitin Ligase WWP1 Interacts with Ebola  
614 Virus VP40 To Regulate Egress. *J Virol* 91.

- 615 29. Baillet N, Krieger S, Carnec X, Mateo M, Journeaux A, Merabet O, Caro V, Tangy F, Vidalain  
616 PO, Baize S. 2019. E3 Ligase ITCH Interacts with the Z Matrix Protein of Lassa and Mopeia  
617 Viruses and Is Required for the Release of Infectious Particles. *Viruses* 12.
- 618 30. Liang J, Sagum CA, Bedford MT, Sidhu SS, Sudol M, Han Z, Harty RN. 2017. Chaperone-  
619 Mediated Autophagy Protein BAG3 Negatively Regulates Ebola and Marburg VP40-Mediated  
620 Egress. *PLoS Pathog* 13:e1006132.
- 621 31. Han Z, Schwoerer MP, Hicks P, Liang J, Ruthel G, Berry CT, Freedman BD, Sagum CA,  
622 Bedford MT, Sidhu SS, Sudol M, Harty RN. 2018. Host Protein BAG3 is a Negative Regulator  
623 of Lassa VLP Egress. *Diseases* 6.
- 624 32. Han Z, Dash S, Sagum CA, Ruthel G, Jaladanki CK, Berry CT, Schwoerer MP, Harty NM,  
625 Freedman BD, Bedford MT, Fan H, Sidhu SS, Sudol M, Shtanko O, Harty RN. 2020. Modular  
626 mimicry and engagement of the Hippo pathway by Marburg virus VP40: Implications for  
627 filovirus biology and budding. *PLoS Pathog* 16:e1008231.
- 628 33. Han Z, Ruthel G, Dash S, Berry CT, Freedman BD, Harty RN, Shtanko O. 2020. Angiomotin  
629 regulates budding and spread of Ebola virus. *J Biol Chem* 295:8596-8601.
- 630 34. Aqeilan RI, Donati V, Gaudio E, Nicoloso MS, Sundvall M, Korhonen A, Lundin J, Isola J,  
631 Sudol M, Joensuu H, Croce CM, Elenius K. 2007. Association of Wwox with ErbB4 in breast  
632 cancer. *Cancer Res* 67:9330-6.
- 633 35. Chang NS, Hsu LJ, Lin YS, Lai FJ, Sheu HM. 2007. WW domain-containing oxidoreductase: a  
634 candidate tumor suppressor. *Trends Mol Med* 13:12-22.
- 635 36. Bouteille N, Driouch K, Hage PE, Sin S, Formstecher E, Camonis J, Lidereau R, Lallemand F.  
636 2009. Inhibition of the Wnt/beta-catenin pathway by the WWOX tumor suppressor protein.  
637 *Oncogene* 28:2569-80.
- 638 37. Del Mare S, Salah Z, Aqeilan RI. 2009. WWOX: its genomics, partners, and functions. *J Cell*  
639 *Biochem* 108:737-45.

- 640 38. Abu-Odeh M, Bar-Mag T, Huang H, Kim T, Salah Z, Abdeen SK, Sudol M, Reichmann D,  
641 Sidhu S, Kim PM, Aqeilan RI. 2014. Characterizing WW domain interactions of tumor  
642 suppressor WWOX reveals its association with multiprotein networks. *J Biol Chem* 289:8865-  
643 80.
- 644 39. Wang M, Li Y, Wu M, Wang W, Gong B, Wang Y. 2014. WWOX suppresses cell growth and  
645 induces cell apoptosis via inhibition of P38 nuclear translocation in cholangiocarcinoma. *Cell*  
646 *Physiol Biochem* 34:1711-22.
- 647 40. Lo JY, Chou YT, Lai FJ, Hsu LJ. 2015. Regulation of cell signaling and apoptosis by tumor  
648 suppressor WWOX. *Exp Biol Med (Maywood)* 240:383-91.
- 649 41. Abu-Remaileh M, Joy-Dodson E, Schueler-Furman O, Aqeilan RI. 2015. Pleiotropic Functions  
650 of Tumor Suppressor WWOX in Normal and Cancer Cells. *J Biol Chem* 290:30728-35.
- 651 42. Chang NS, Lin R, Sze CI, Aqeilan RI. 2019. Editorial: WW Domain Proteins in Signaling,  
652 Cancer Growth, Neural Diseases, and Metabolic Disorders. *Front Oncol* 9:719.
- 653 43. Chen YA, Lu CY, Cheng TY, Pan SH, Chen HF, Chang NS. 2019. WW Domain-Containing  
654 Proteins YAP and TAZ in the Hippo Pathway as Key Regulators in Stemness Maintenance,  
655 Tissue Homeostasis, and Tumorigenesis. *Front Oncol* 9:60.
- 656 44. Anonymous. 2019. WW Domain Proteins in Signaling, Cancer Growth, Neural Diseases, and  
657 Metabolic Disorders doi:10.3389/978-2-88963-177-3.
- 658 45. Zhao B, Li L, Lu Q, Wang LH, Liu CY, Lei Q, Guan KL. 2011. Angiotensin is a novel Hippo  
659 pathway component that inhibits YAP oncoprotein. *Genes Dev* 25:51-63.
- 660 46. Yi C, Shen Z, Stemmer-Rachamimov A, Dawany N, Troutman S, Showe LC, Liu Q, Shimono  
661 A, Sudol M, Holmgren L, Stanger BZ, Kissil JL. 2013. The p130 isoform of angiotensin is  
662 required for Yap-mediated hepatic epithelial cell proliferation and tumorigenesis. *Sci Signal*  
663 6:ra77.



- 664 47. Klimek C, Kathage B, Wördehoff J, Höhfeld J. 2017. BAG3-mediated proteostasis at a glance.  
665 130:2781-2788.
- 666 48. Paramasivam M, Sarkeshik A, Yates JR, 3rd, Fernandes MJ, McCollum D. 2011. Angiomotin  
667 family proteins are novel activators of the LATS2 kinase tumor suppressor. *Mol Biol Cell*  
668 22:3725-33.
- 669 49. Dai X, She P, Chi F, Feng Y, Liu H, Jin D, Zhao Y, Guo X, Jiang D, Guan KL, Zhong TP, Zhao  
670 B. 2013. Phosphorylation of angiomotin by Lats1/2 kinases inhibits F-actin binding, cell  
671 migration, and angiogenesis. *J Biol Chem* 288:34041-51.
- 672 50. Mana-Capelli S, Paramasivam M, Dutta S, McCollum D. 2014. Angiomotins link F-actin  
673 architecture to Hippo pathway signaling. 25:1676-1685.
- 674 51. Saigo C, Kito Y, Takeuchi T. 2018. Cancerous Protein Network That Inhibits the Tumor  
675 Suppressor Function of WW Domain-Containing Oxidoreductase (WWOX) by Aberrantly  
676 Expressed Molecules. *Front Oncol* 8:350.
- 677 52. Wells CD, Fawcett JP, Traweger A, Yamanaka Y, Goudreault M, Elder K, Kulkarni S, Gish G,  
678 Virag C, Lim C, Colwill K, Starostine A, Metalnikov P, Pawson T. 2006. A Rich1/Amot complex  
679 regulates the Cdc42 GTPase and apical-polarity proteins in epithelial cells. *Cell* 125:535-48.
- 680 53. Moleirinho S, Hoxha S, Mandati V, Curtale G, Troutman S, Ehmer U, Kissil JL. 2017.  
681 Regulation of localization and function of the transcriptional co-activator YAP by angiomotin.  
682 *Elife* 6.
- 683 54. Brunner P, Hastar N, Kaehler C, Burdzinski W, Jatzlau J, Knaus P. 2020. AMOT130 drives  
684 BMP-SMAD signaling at the apical membrane in polarized cells. *Mol Biol Cell* 31:118-130.
- 685 55. Bratt A, Birot O, Sinha I, Veitonmäki N, Aase K, Ernkvist M, Holmgren L. 2005. Angiomotin  
686 regulates endothelial cell-cell junctions and cell motility. *J Biol Chem* 280:34859-69.
- 687 56. Aqeilan RI, Croce CM. 2007. WWOX in biological control and tumorigenesis. *J Cell Physiol*  
688 212:307-10.



- 689 57. Farooq A. 2015. Structural insights into the functional versatility of WW domain-containing  
690 oxidoreductase tumor suppressor. *Exp Biol Med (Maywood)* 240:361-74.
- 691 58. Wang C, An J, Zhang P, Xu C, Gao K, Wu D, Wang D, Yu H, Liu JO, Yu L. 2012. The Nedd4-  
692 like ubiquitin E3 ligases target angiotensin/p130 to ubiquitin-dependent degradation. *Biochem J*  
693 444:279-89.
- 694 59. Bednarek AK, Keck-Waggoner CL, Daniel RL, Laflin KJ, Bergsagel PL, Kiguchi K, Brenner AJ,  
695 Aldaz CM. 2001. WWOX, the FRA16D gene, behaves as a suppressor of tumor growth.  
696 *Cancer Res* 61:8068-73.
- 697 60. Lan YY, Wu SY, Lai HC, Chang NS, Chang FH, Tsai MH, Su IJ, Chang Y. 2013. WW domain-  
698 containing oxidoreductase is involved in upregulation of matrix metalloproteinase 9 by Epstein-  
699 Barr virus latent membrane protein 2A. *Biochem Biophys Res Commun* 436:672-6.
- 700 61. Fu J, Qu Z, Yan P, Ishikawa C, Aqeilan RI, Rabson AB, Xiao G. 2011. The tumor suppressor  
701 gene WWOX links the canonical and noncanonical NF-kappaB pathways in HTLV-I Tax-  
702 mediated tumorigenesis. *Blood* 117:1652-61.
- 703 62. Chang Y, Lan YY, Hsiao JR, Chang NS. 2015. Strategies of oncogenic microbes to deal with  
704 WW domain-containing oxidoreductase. *Exp Biol Med (Maywood)* 240:329-37.
- 705 63. Jin C, Ge L, Ding X, Chen Y, Zhu H, Ward T, Wu F, Cao X, Wang Q, Yao X. 2006. PKA-  
706 mediated protein phosphorylation regulates ezrin-WWOX interaction. *Biochem Biophys Res*  
707 *Commun* 341:784-91.
- 708 64. Salah Z, Aqeilan R, Huebner K. 2010. WWOX gene and gene product: tumor suppression  
709 through specific protein interactions. *Future Oncol* 6:249-59.
- 710 65. Ferguson BW, Gao X, Zelazowski MJ, Lee J, Jeter CR, Abba MC, Aldaz CM. 2013. The  
711 cancer gene WWOX behaves as an inhibitor of SMAD3 transcriptional activity via direct  
712 binding. *BMC Cancer* 13:593.

- 713 66. Hussain T, Lee J, Abba MC, Chen J, Aldaz CM. 2018. Delineating WWOX Protein Interactome  
714 by Tandem Affinity Purification-Mass Spectrometry: Identification of Top Interactors and Key  
715 Metabolic Pathways Involved. *Front Oncol* 8:591.
- 716 67. Bonin F, Taouis K, Azorin P, Petitalot A, Tariq Z, Nola S, Bouteille N, Tury S, Vacher S, Bieche  
717 I, Rais KA, Pierron G, Fuhrmann L, Vincent-Salomon A, Formstecher E, Camonis J, Lidereau  
718 R, Lallemand F, Driouch K. 2018. VOPP1 promotes breast tumorigenesis by interacting with  
719 the tumor suppressor WWOX. *BMC Biol* 16:109.
- 720 68. Kindrachuk J, Wahl-Jensen V, Safronetz D, Trost B, Hoenen T, Arsenault R, Feldmann F,  
721 Traynor D, Postnikova E, Kusalik A, Napper S, Blaney JE, Feldmann H, Jahrling PB. 2014.  
722 Ebola virus modulates transforming growth factor beta signaling and cellular markers of  
723 mesenchyme-like transition in hepatocytes. *J Virol* 88:9877-92.
- 724 69. Hsu LJ, Schultz L, Hong Q, Van Moer K, Heath J, Li MY, Lai FJ, Lin SR, Lee MH, Lo CP, Lin  
725 YS, Chen ST, Chang NS. 2009. Transforming growth factor beta1 signaling via interaction with  
726 cell surface Hyal-2 and recruitment of WWOX/WOX1. *J Biol Chem* 284:16049-59.
- 727 70. Bendinelli P, Maroni P, Matteucci E, Desiderio MA. 2015. HGF and TGFbeta1 differently  
728 influenced Wwox regulatory function on Twist program for mesenchymal-epithelial transition in  
729 bone metastatic versus parental breast carcinoma cells. *Mol Cancer* 14:112.
- 730 71. Li J, Liu J, Li P, Zhou C, Liu P. 2018. The downregulation of WWOX induces epithelial-  
731 mesenchymal transition and enhances stemness and chemoresistance in breast cancer. *Exp*  
732 *Biol Med (Maywood)* 243:1066-1073.
- 733 72. Bratt A, Wilson WJ, Troyanovsky B, Aase K, Kessler R, Van Meir EG, Holmgren L. 2002.  
734 Angiotensin belongs to a novel protein family with conserved coiled-coil and PDZ binding  
735 domains. *Gene* 298:69-77.
- 736 73. Moleirinho S, Guerrant W, Kissil JL. 2014. The Angiotensins - From discovery to function. *Febs*  
737 *Letters* 588:2693-2703.

- 738 74. Simonovic I, Arpin M, Koutsouris A, Falk-Krzesinski HJ, Hecht G. 2001. Enteropathogenic  
739 *Escherichia coli* activates ezrin, which participates in disruption of tight junction barrier  
740 function. *Infect Immun* 69:5679-88.
- 741 75. Pujuguet P, Del Maestro L, Gautreau A, Louvard D, Arpin M. 2003. Ezrin regulates E-cadherin-  
742 dependent adherens junction assembly through Rac1 activation. *Mol Biol Cell* 14:2181-91.
- 743 76. Pidoux G, Gerbaud P, Dompierre J, Lygren B, Solstad T, Evain-Brion D, Tasken K. 2014. A  
744 PKA-ezrin-Cx43 signaling complex controls gap junction communication and thereby  
745 trophoblast cell fusion. *J Cell Sci* 127:4172-85.
- 746 77. Dukic AR, Haugen LH, Pidoux G, Leithe E, Bakke O, Tasken K. 2017. A protein kinase A-ezrin  
747 complex regulates connexin 43 gap junction communication in liver epithelial cells. *Cell Signal*  
748 32:1-11.
- 749 78. Ludes-Meyers JH, Kil H, Parker-Thornburg J, Kusewitt DF, Bedford MT, Aldaz CM. 2009.  
750 Generation and Characterization of Mice Carrying a Conditional Allele of the *Wwox* Tumor  
751 Suppressor Gene. *Plos One* 4.
- 752 79. Aase K, Ernkvist M, Ebarasi L, Jakobsson L, Majumdar A, Yi C, Birot O, Ming Y, Kvanta A,  
753 Edholm D, Aspenstrom P, Kissil J, Claesson-Welsh L, Shimono A, Holmgren L. 2007.  
754 Angiotensin regulates endothelial cell migration during embryonic angiogenesis. *Genes &*  
755 *Development* 21:2055-2068.
- 756 80. Zheng YJ, Vertuani S, Nystrom S, Audebert S, Meijer I, Tegnebratt T, Borg JP, Uhlen P,  
757 Majumdar A, Holmgren L. 2009. Angiotensin-Like Protein 1 Controls Endothelial Polarity and  
758 Junction Stability During Sprouting Angiogenesis. *Circulation Research* 105:260-U148.
- 759 81. Bateman A, Martin MJ, Orchard S, Magrane M, Alpi E, Bely B, Bingley M, Britto R, Bursteinas  
760 B, Busiello G, Bye-A-Jee H, Da Silva A, De Giorgi M, Dogan T, Castro LG, Garmiri P,  
761 Georghiou G, Gonzales D, Gonzales L, Hatton-Ellis E, Ignatchenko A, Ishtiaq R, Jokinen P,  
762 Joshi V, Jyothi D, Lopez R, Luo J, Lussi Y, MacDougall A, Madeira F, Mahmoudy M, Menchi

- 763 M, Nightingale A, Onwubiko J, Palka B, Pichler K, Pundir S, Qi GY, Raj S, Renaux A, Lopez  
764 MR, Saidi R, Sawford T, Shypitsyna A, Speretta E, Turner E, Tyagi N, Vasudev P, Volynkin V,  
765 Wardell T. 2019. UniProt: a worldwide hub of protein knowledge. *Nucleic Acids Research*  
766 47:D506-D515.
- 767 82. Camacho C, Coulouris G, Avagyan V, Ma N, Papadopoulos J, Bealer K, Madden TL. 2009.  
768 BLAST plus : architecture and applications. *Bmc Bioinformatics* 10.
- 769 83. Larkin MA, Blackshields G, Brown NP, Chenna R, McGettigan PA, McWilliam H, Valentin F,  
770 Wallace IM, Wilm A, Lopez R, Thompson JD, Gibson TJ, Higgins DG. 2007. Clustal W and  
771 clustal X version 2.0. *Bioinformatics* 23:2947-2948.
- 772 84. Kanelis V, Rotin D, Forman-Kay JD. 2001. Solution structure of a Nedd4 WW domain-ENaC  
773 peptide complex. *Nature Structural Biology* 8:407-412.
- 774 85. Shen MY, Sali A. 2006. Statistical potential for assessment and prediction of protein structures.  
775 *Protein Science* 15:2507-2524.
- 776 86. Tubert-Brohman I, Sherman W, Repasky M, Beuming T. 2013. Improved Docking of  
777 Polypeptides with Glide. *Journal of Chemical Information and Modeling* 53:1689-1699.
- 778

## 779 **Figure Legends**

780 **Fig. 1. Identification of WWOX as a host interactor with filovirus and arenavirus matrix proteins. A)**  
781 Schematic diagrams of EBOV VP40, MARV VP40 and LASV Z proteins showing amino acid numbers  
782 and locations of L-domain motifs. **B)** Schematic diagram of the WW-domain array. Each lettered  
783 square contains 12 WW- and/or SH3 GST fusion proteins in duplicate. A mock (M) GST control is in  
784 the center of each square. The biotinylated PPxY-WT or PPxY mutant peptides of eVP40, mVP40,  
785 and LASV-Z were used to probe the array. **C-E)** The fluorescent patterns for Box E indicating positive  
786 interactions between the indicated WT PPxY peptide and specific WW domains. The WT mVP40 **(D)**  
787 and LASV-Z **(E)** peptides interacted with the WW1 domain of WWOX (yellow ovals in the red

788 squares). The WT eVP40 **(C)** peptide did not interact with the WW1 domain of WWOX (dotted red  
789 square).

790 **Fig. 2. GST pulldown assays of VP40/Z and WWOX. A)** Schematic diagram of the 414 amino acid  
791 WWOX protein highlighting the locations of the WW1 (pink), WW2 (blue), nuclear localization signal  
792 (green), and the short chain dehydrogenase/reductase (SDR) domain (orange). **B)** Purified GST,  
793 GST-WWOX-WW1, and GST-WWOX-WW2 fusion proteins in input (left, lanes 1-3) and pull-downs  
794 (right, lanes 1-6) were detected by Western blotting using anti-GST antibody. **C-E)** Western blots of  
795 HEK293T cell extracts showing expression of the indicated input WT or PPxY mutant proteins (left,  
796 lanes 1 and 2). Western blots of full-length WT and PPxY mutants of eVP40, mVP40, and LASV-Z  
797 pulled down with either GST alone (right, lanes 1 and 2), GST-WWOX-WW1 (right, lanes 3 and 4), or  
798 GST-WWOX-WW2 (right, lanes 5 and 6).

799 **Fig. 3. WWOX interacts with VP40/Z in a PPxY-dependent manner. A)** Extracts from HEK293T cells  
800 transfected with the indicated plasmids were immunoprecipitated (IP) with either normal rabbit IgG or  
801 anti-eVP40 antisera, and the precipitated proteins were analyzed by Western blotting (WB) using  
802 mouse anti-myc (WWOX) or anti-eVP40 antisera (right, lanes 1-6). Expression controls for eVP40,  
803 eVP40- $\Delta$ PT/PY, WWOX and  $\beta$ -actin are shown (left, lanes 1-3). **B)** Extracts from HEK293T cells  
804 transfected with the indicated plasmids were immunoprecipitated (IP) with either normal mouse IgG  
805 or mouse anti-flag (mVP40) antisera, and the precipitated proteins were analyzed by Western blotting  
806 (WB) using rabbit anti-myc (WWOX) or mouse anti-flag antisera (right, lanes 1-6). Expression  
807 controls for mVP40, mVP40-P>A, WWOX and  $\beta$ -actin are shown (left, lanes 1-3). **C)** Extracts from  
808 HEK293T cells transfected with the indicated plasmids were immunoprecipitated (IP) with either  
809 normal mouse IgG or anti-myc (WWOX) antisera, and the precipitated proteins were analyzed by  
810 Western blotting (WB) using mouse anti-myc (WWOX) or rabbit anti-LASV-Z antisera (right, lanes 1-  
811 6). Expression controls for LASV-Z, LASV-Z- $\Delta$ PY, WWOX and  $\beta$ -actin are shown (left, lanes 1-3).

812 **Fig. 4. VP40/Z interact with endogenous WWOX.** MCF7 cells mock transfected, or transfected with

813 HA-tagged eVP40 (**A**), flag-tagged mVP40 (**B**), or HA-tagged LASV-Z (**C**) as indicated. Extracts were  
814 first immunoprecipitated with either mouse IgG as a negative control, anti-HA, or anti-flag antisera as  
815 indicated, and precipitates were then analyzed by Western blotting using anti-WWOX antiserum (**A-C**,  
816 bottom blots, lanes 1-3). Precipitates were also analyzed by Western blotting using mouse anti-HA or  
817 anti-flag antibodies as positive controls (**A-C**, top blots, lanes 1-3). Expression (input) controls for  
818 endogenous WWOX and  $\beta$ -actin, as well as exogenous eVP40, mVP40 and LASV-Z are shown (**A-C**,  
819 input, lanes 4 and 5).

820 **Fig. 5. WWOX inhibits budding of VP40/Z VLPs in a PPxY-dependent manner. A-C)** HEK293T cells  
821 were transfected with the indicated plasmids, and proteins in cell lysates and VLPs were detected by  
822 Western blotting and quantified using NIH Image-J software.

823 **Fig. 6. WWOX inhibits budding of VP40/Z VLPs in a dose-dependent manner. A, C, and E)** HEK293T  
824 cells were transfected with constant amounts of eVP40, mVP40, or LASV-Z plasmids plus increasing  
825 amounts of WWOX. The indicated proteins were detected in cell lysates and VLPs by Western  
826 blotting, and proteins in VLPs were quantified ( ) using NIH Image-J software. **B, D, and F)**  
827 Quantification of the relative budding efficiency of eVP40, mVP40, or LASV-Z VLPs under the  
828 indicated conditions from three independent experiments (n=3). The ratio of WWOX plasmid to viral  
829 plasmid is shown in ( ). Statistical significance was analyzed by a one-way ANOVA. ns: not significant,  
830 \*= p<0.05, \*\*\*\*= p<0.0001.

831 **Fig. 7. Role of WW1 domain in mediating WWOX-VP40/Z interactions and VLP budding inhibition. A,**  
832 **C, and E)** HEK293T cells were transfected with either WT WWOX or WW1 domain mutant  
833 W44AP47A plus either eVP40 (**A**), mVP40 (**C**) or LASV-Z (**E**) as indicated. Cell extracts were  
834 immunoprecipitated with either normal IgG (lanes 1 and 2) or anti-myc antibody (lanes 3 and 4) and  
835 the precipitated proteins were analyzed by Western blotting using appropriate antisera as indicated.  
836 Input levels of the indicated proteins were determined by Western blotting (lanes 5 and 6). **B, D, and**  
837 **F)** HEK293T cells were transfected with eVP40 (**B**), mVP40 (**D**) or LASV-Z (**F**) alone, or with either



838 WT WWOX or mutant W44AP47A as indicated. Cellular proteins and VLPs were detected by  
839 Western blotting and VLPs were quantified using NIH Image-J software as shown in parentheses.

840 **Fig. 8.** siRNA knockdown of endogenous WWOX positively regulates VLP egress. **A-C)** Huh-7 cells  
841 were transfected with either random (control) or WWOX-specific siRNAs plus eVP40 **(A)**, mVP40 **(B)**,  
842 or LASV-Z **(C)** plasmids as indicated. Proteins in cell extracts and VLPs were detected by Western  
843 blotting and quantified using NIH Image-J software as indicated in parentheses. VLP egress from  
844 control cells (lane 1) was set at 100%. **D)** Quantification of the relative budding efficiency of eVP40,  
845 mVP40, and LASV-Z VLPs in the presence of control (blue bars) or WWOX-specific (pink bars)  
846 siRNAs from three independent experiments is shown. Statistical significance was analyzed by a  
847 student t test, separately, \* =  $p < 0.05$ .

848 **Fig. 9.** WWOX alters the intracellular localization of eVP40 and mVP40. **A and B)** HEK293T cells  
849 were transfected with eVP40 **(A)** or mVP40 **(B)** alone, or with WWOX as indicated. Representative  
850 images displaying the intracellular localization patterns of eVP40 (green), mVP40 (green), WWOX  
851 (red), and nuclei (blue) are shown. Scale bars = 10 $\mu$ m. **C and D)** HEK293T cells were transfected  
852 with eVP40 **(C)** or mVP40 **(D)** alone, or with WWOX as indicated. The cytosol, nuclear and plasma  
853 membrane (PM) fractions were isolated at 24h post-transfection, and the indicated proteins were  
854 detected by Western blotting.

855 **Fig. 10.** Angiomotin rescues VP40 VLP budding in the presence of WWOX. **A-C)** Docking models are  
856 shown for the following protein-peptide combinations: **A)** WWOX WW1 domain (white) and eVP40  
857 PPxY peptide (MRRVILPTAPPEYMEAI, green), **B)** WWOX WW1 domain (white) and mVP40 PPxY  
858 peptide (MQYLNPPPYADHGANQL, green), and **C)** WWOX WW1 domain (white) and AMOT PPxY  
859 peptide 2 (QLMRYQHPPPEYGAARPA, green). The first proline (blue) of the PPxY motif occupies the  
860 P1 pocket of WWOX WW1 domain which is formed by W29 and T27, and the Y sidechain (red) of the  
861 PPxY motif occupies the Y pocket which is composed of T27, A20 and H22. **D-G)** HEK293T cells  
862 were transfected with the indicated combinations of plasmids. Cell lysates and VLPs were harvested

863 and proteins were analyzed by Western blotting and quantified using NIH Image-J software (). Bar  
864 graphs of eVP40 **(E)** and mVP40 **(G)** represent data from 3 independent experiments. Statistical  
865 significance was analyzed by a one-way ANOVA. ns: not significant, \*=p<0.05, \*\*\*\*= p<0.0001. **(H)**  
866 Schematic diagram of AMOTp130 and AMOTp80, highlighting the locations of LPTY (pink) and two  
867 PPEY (blue) motifs, followed by Coiled Coil domain (yellow) and PSD-95/DIg1/ZO-1 domain (green).

868 **Fig. 11.** WWOX and AMOT regulate the release of infectious recombinant virus VSV-M40. HEK293T  
869 cells were first transfected with vector alone, WWOX or WWOX plus AMOTp130 or p80 for 24 hours,  
870 and then infected with recombinant virus VSV-M40 **(A)** at a MOI of 0.1 for 8 hours. Supernatants  
871 were harvested and virus titers were determined by standard plaque assay on BHK-21 cells. Each  
872 bar represents the average of three independent experiments performed in duplicate. Statistical  
873 significance was analyzed by one-way ANOVA. ns: not significant, \*\*\*\* = p<0.0001. The indicated  
874 proteins **(B)** from VSV-M40 infected cell extracts were detected by Western blotting.

875



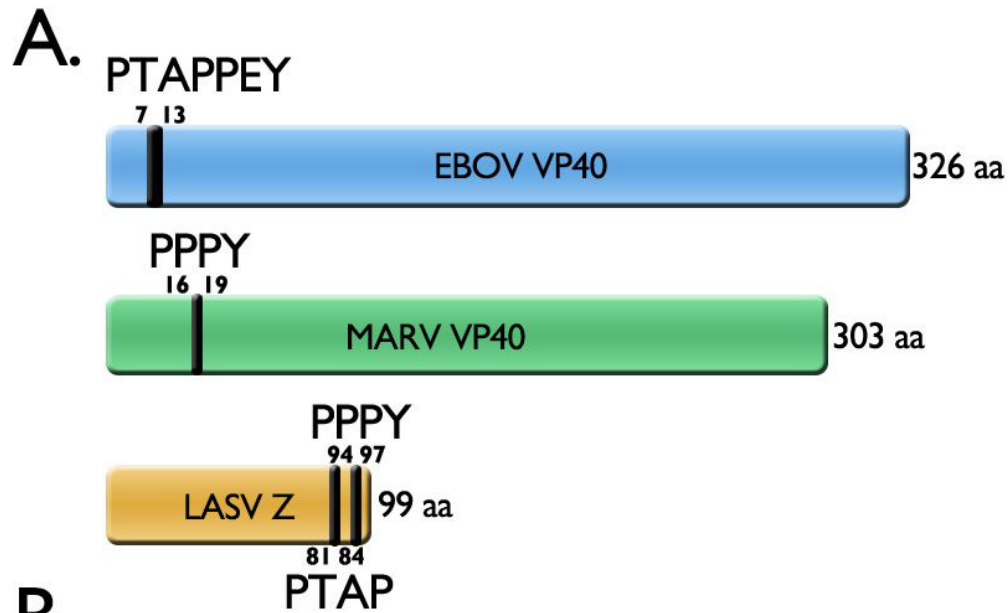

**B.**

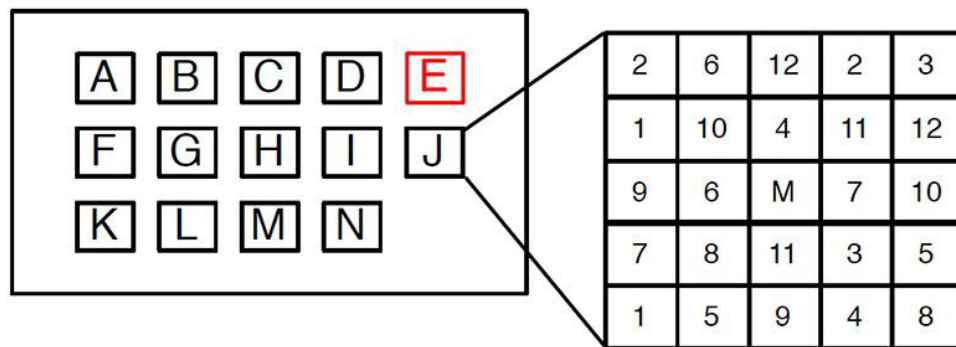

eVP40 peptide: MRRVILPTAP**PPEY**MEAI-K-Biotin

mutant: -----**AAEA**-----

mVP40 peptide: MQYLN**PPPY**ADHGANQL-K-Biotin

mutant: -----**AAPA**-----

LASV-Z peptide: TAPPEIPPSQN**PPPY**SP-K-Biotin

mutant: -----**AAPA**-----

**C.**

eVP40

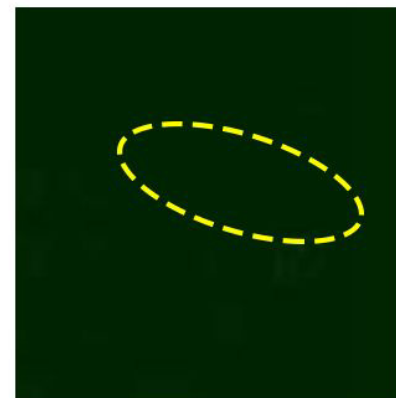

**D.**

mVP40

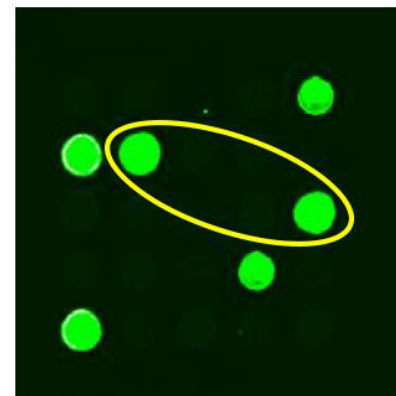

**E.**

LASV-Z

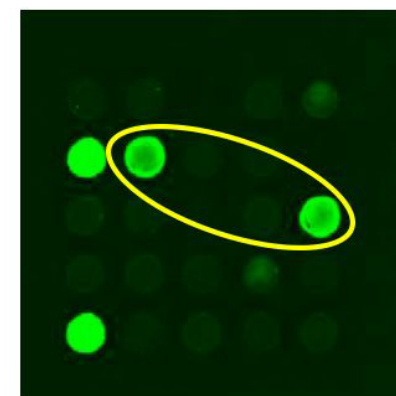

**A.****WVOX**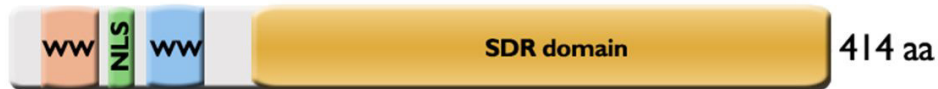**B.**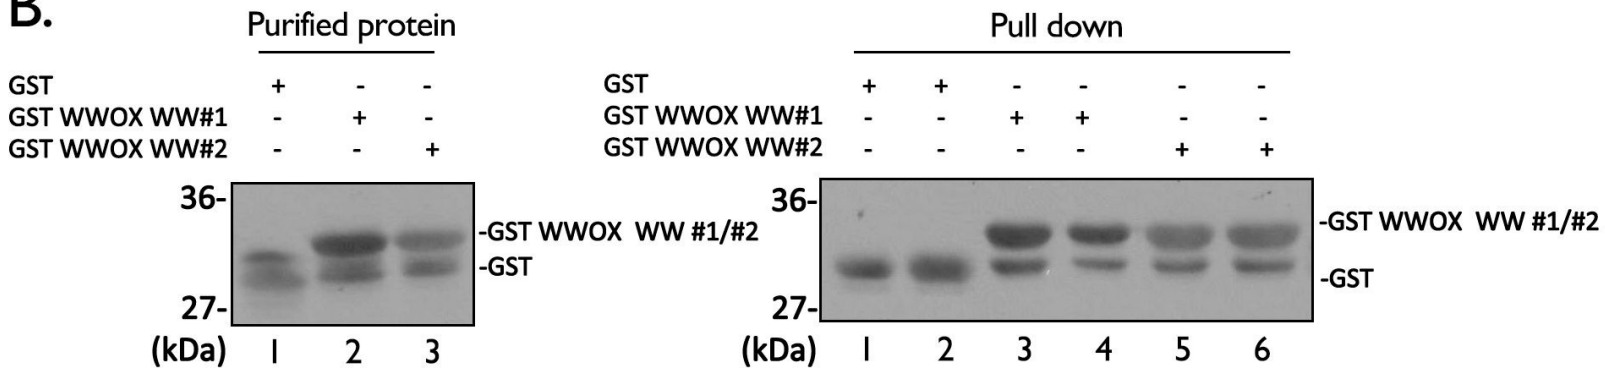**C.**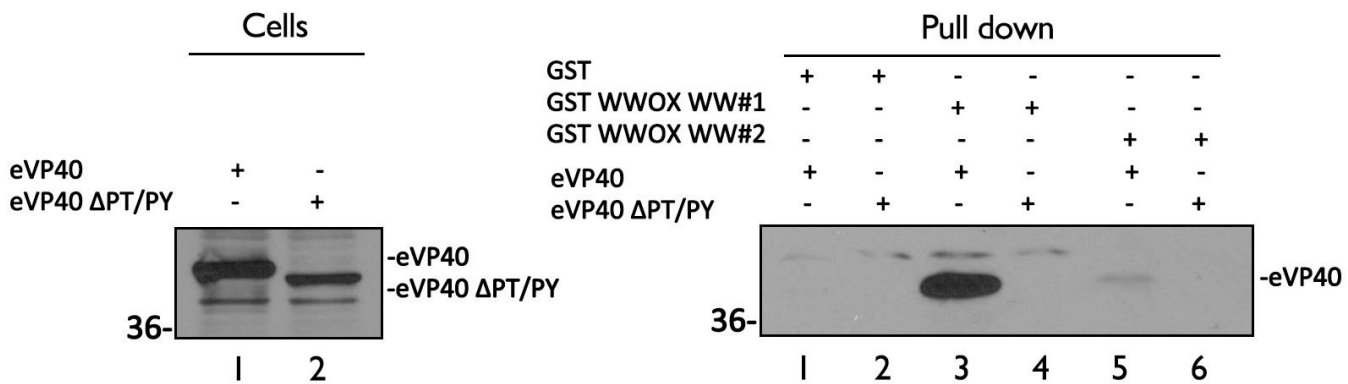**D.**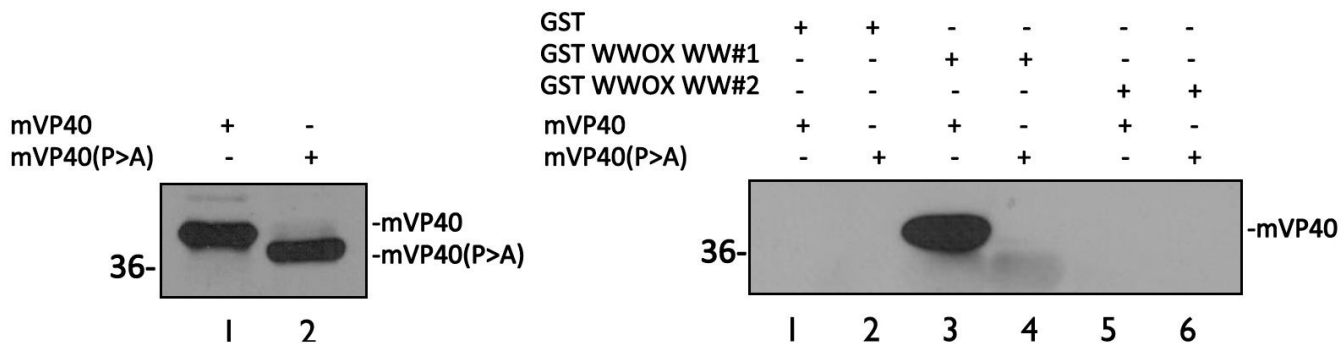**E.**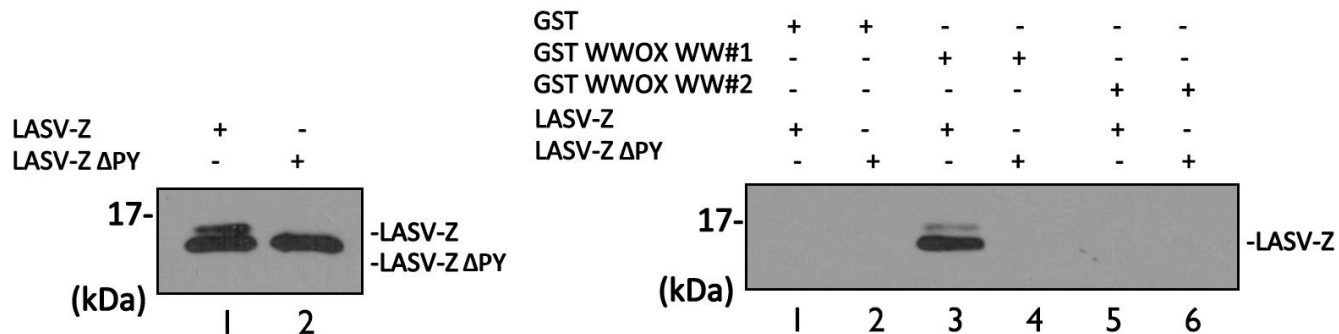

**A.**

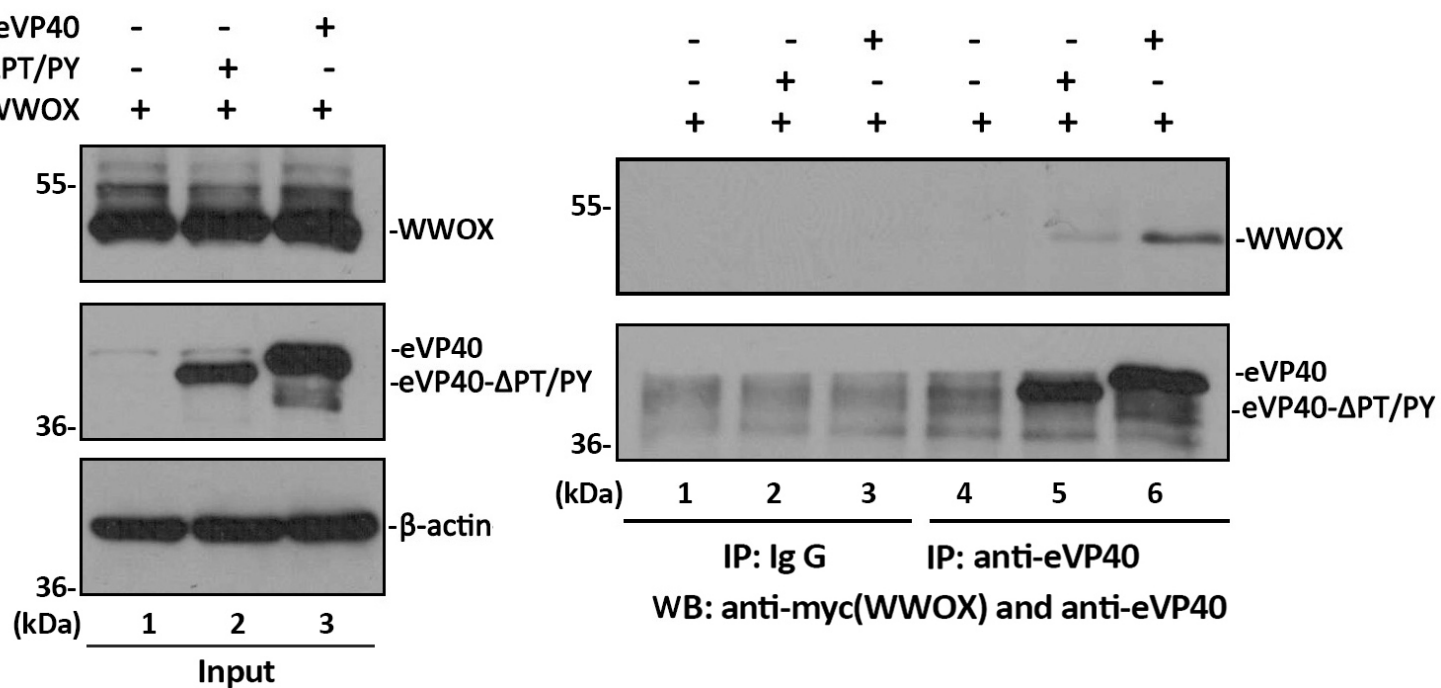

**B.**

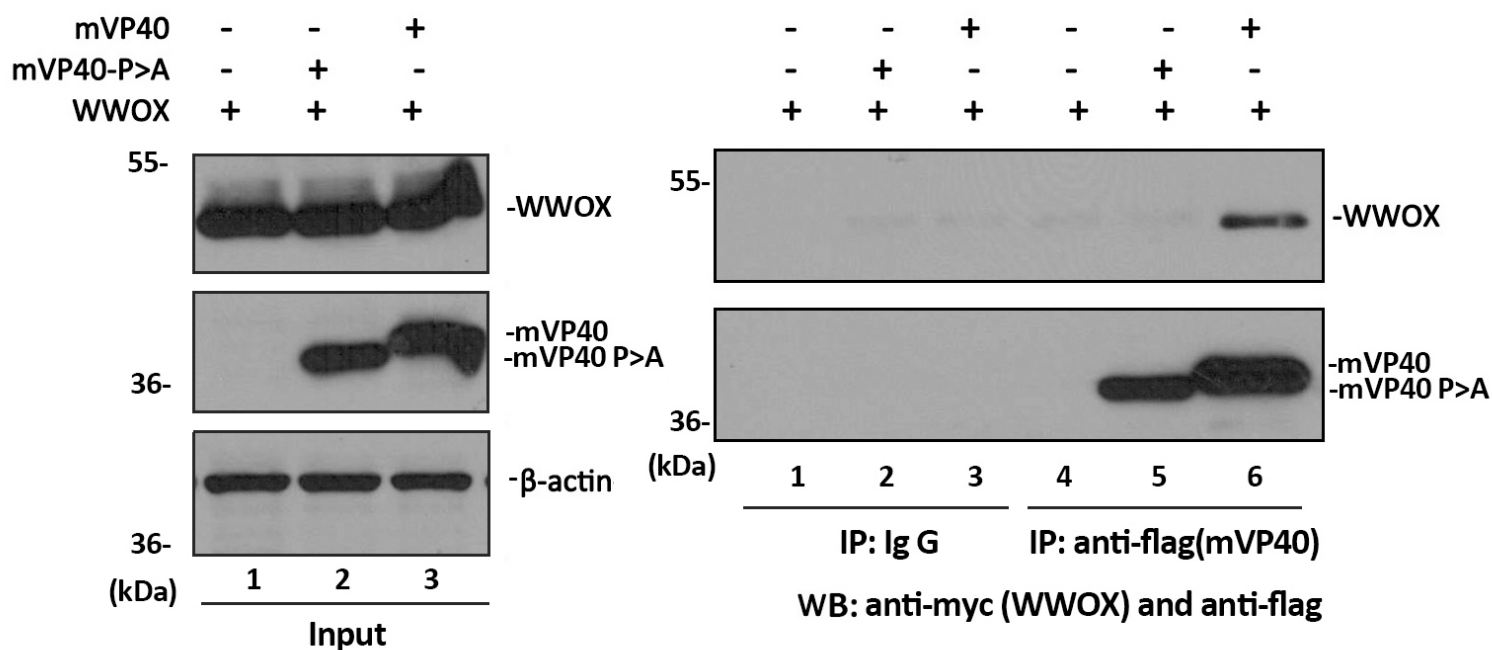

**C.**

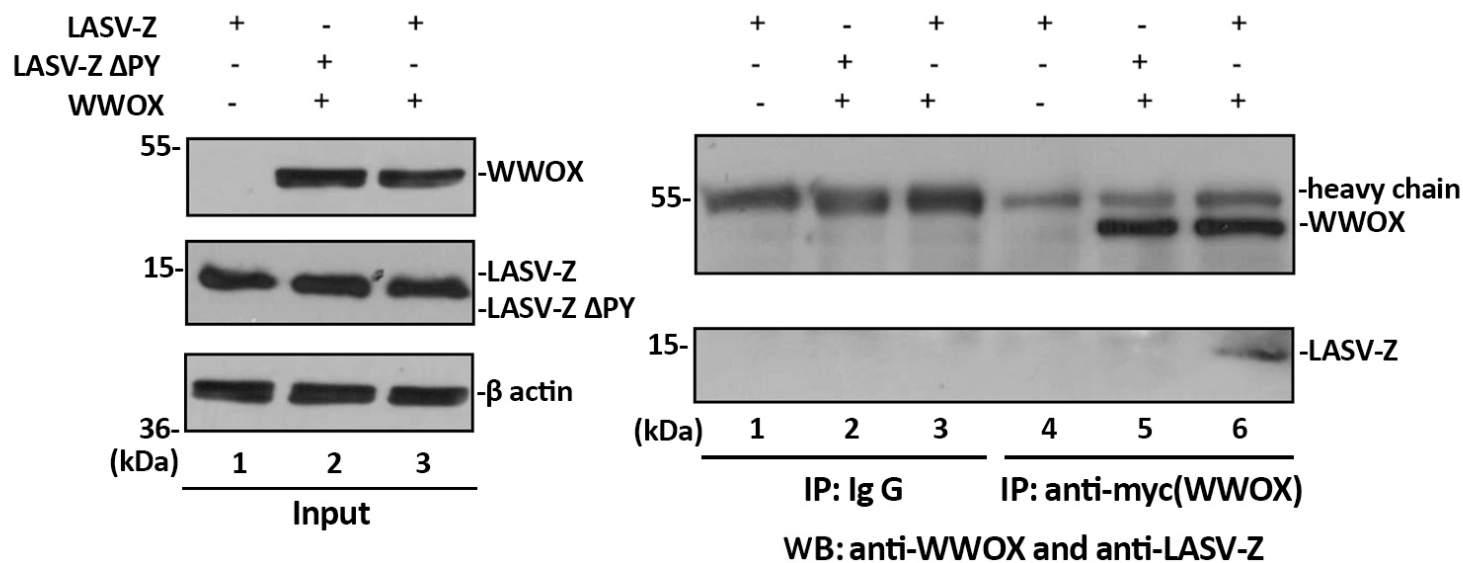

**A.**

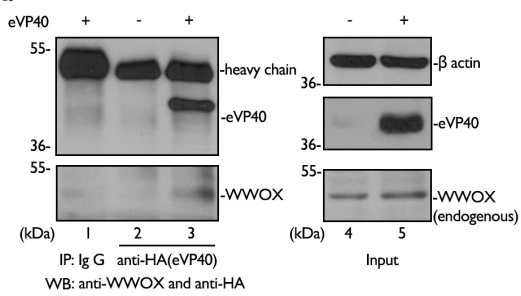

**B.**

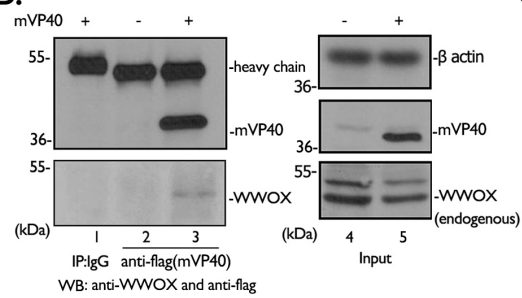

**C.**

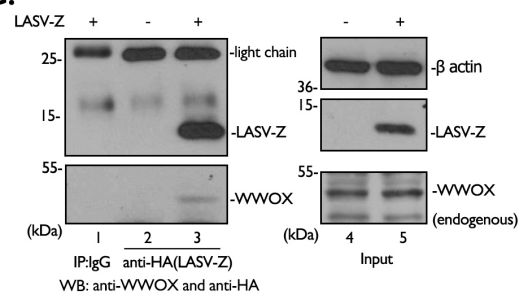

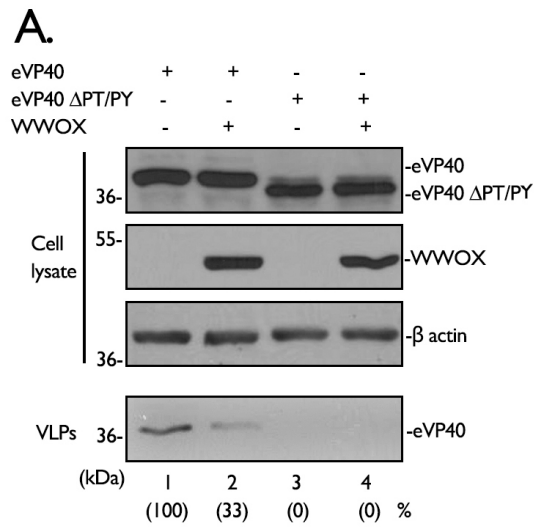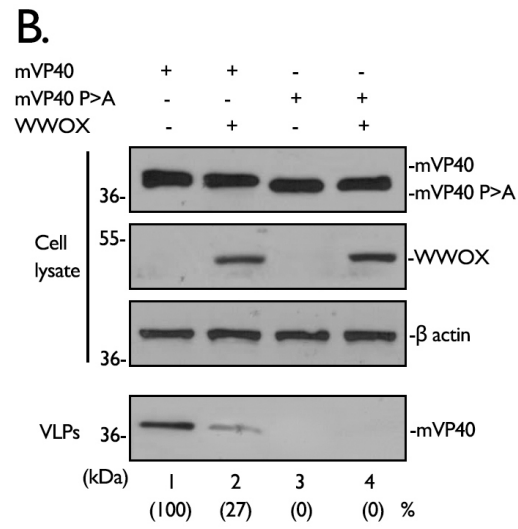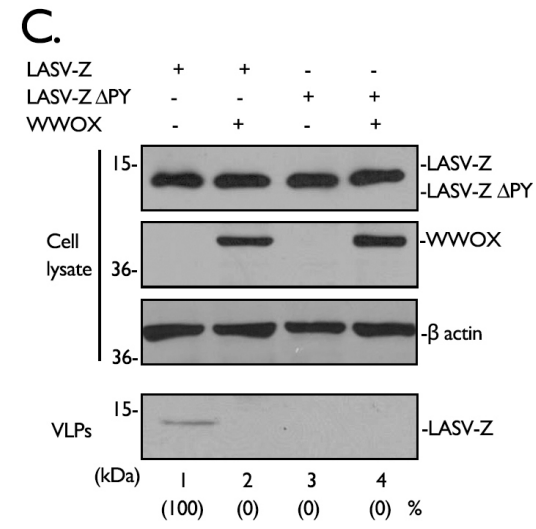

**A.**

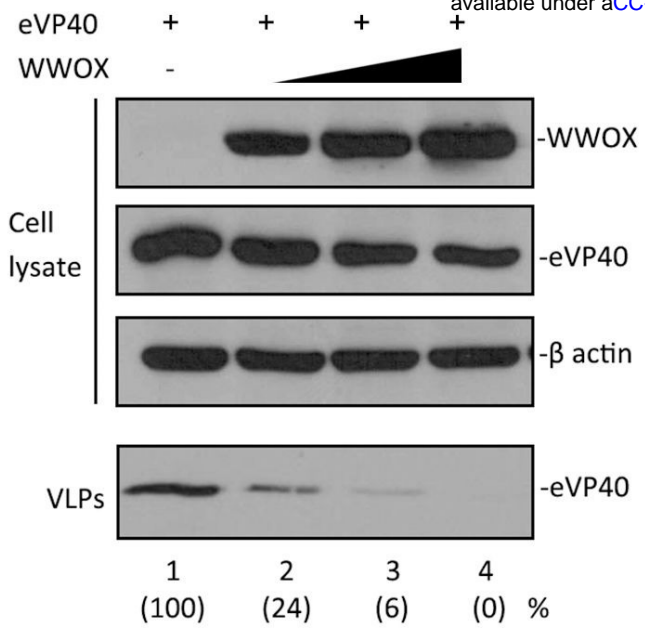

**B.**

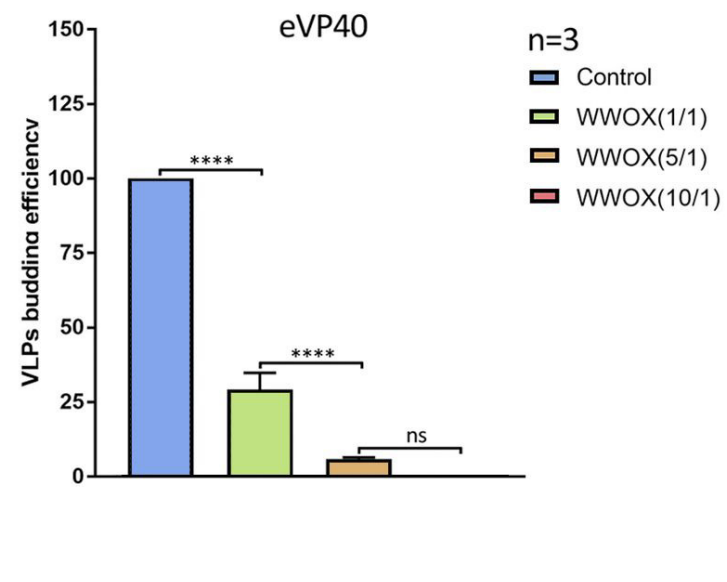

**C.**

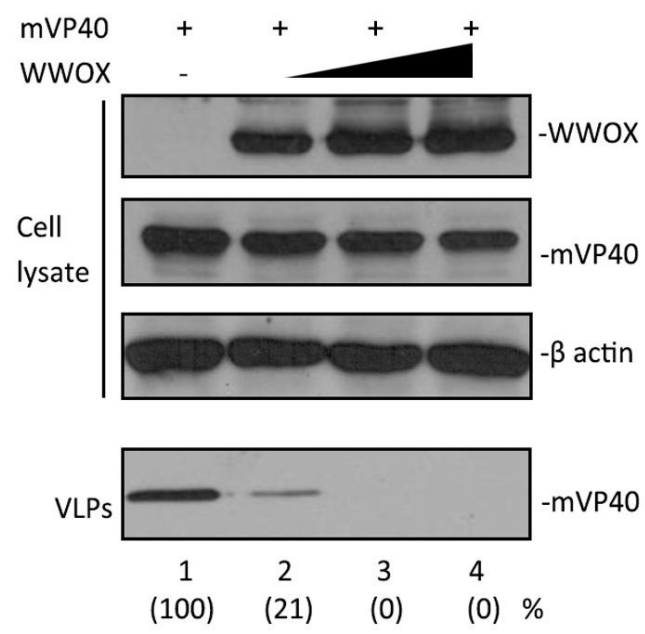

**D.**

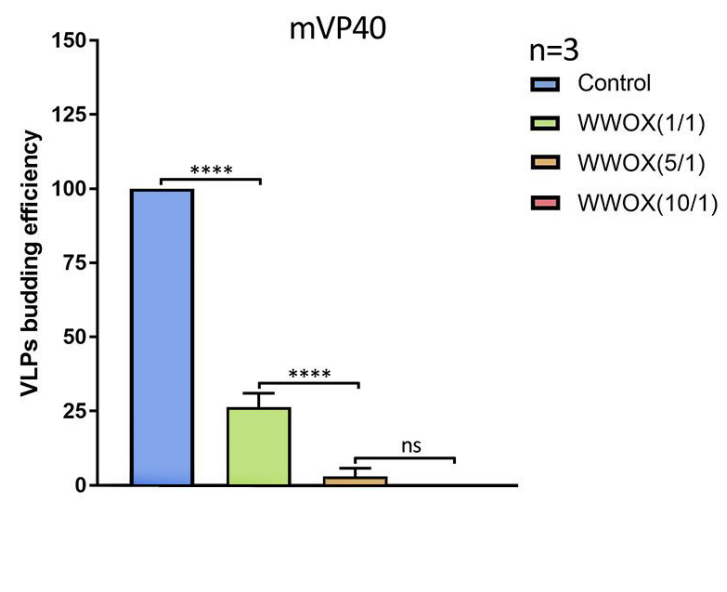

**E.**

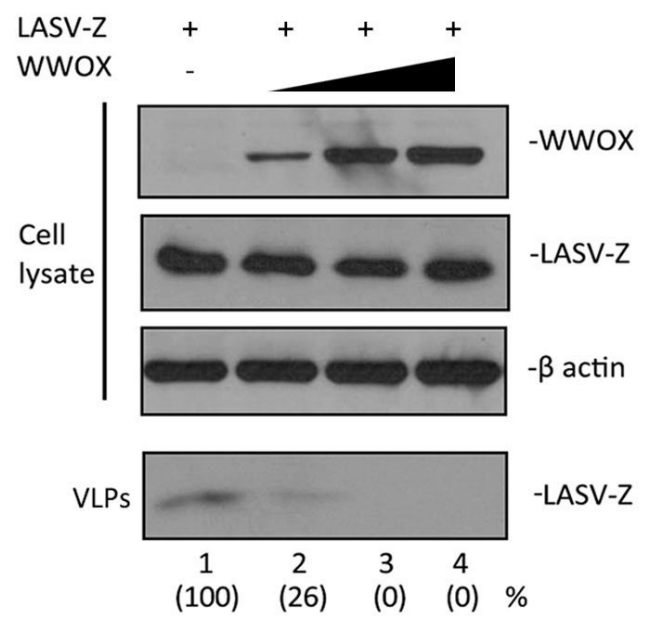

**F.**

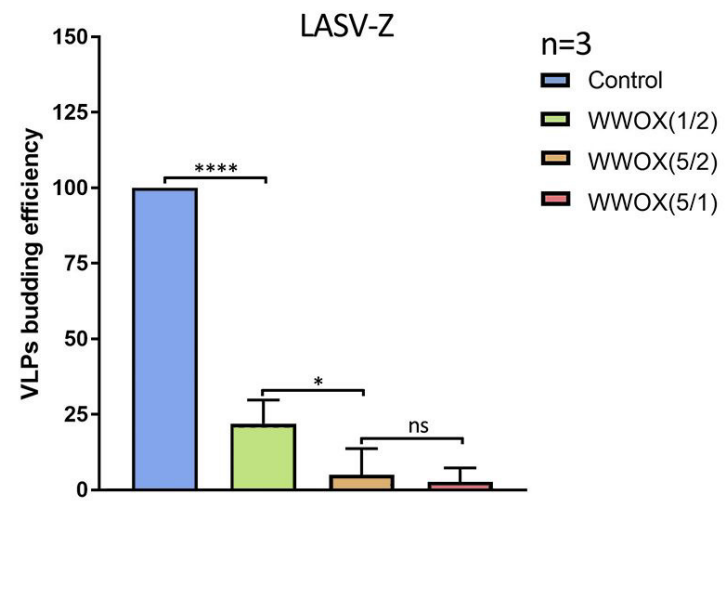



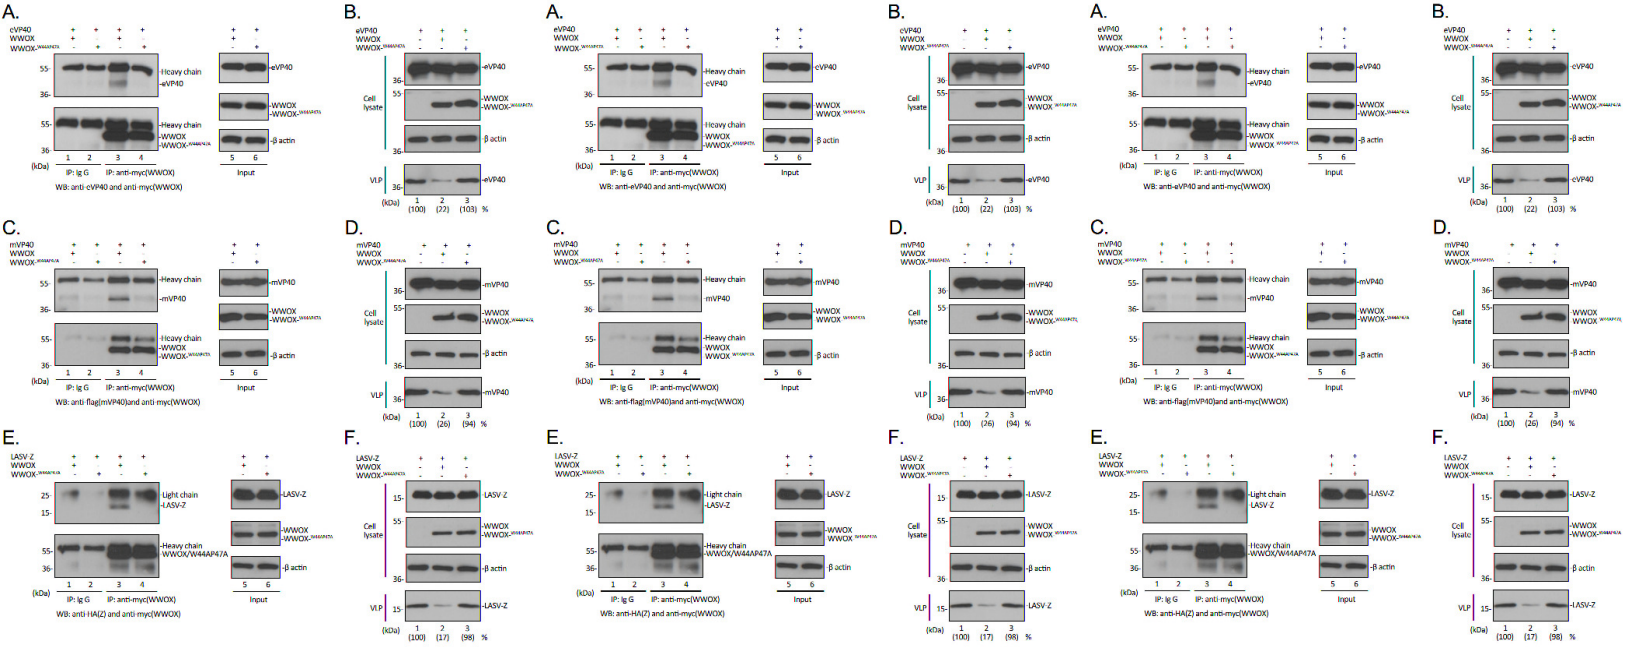

Quantification of Western blot bands for co-immunoprecipitation (Co-IP) analysis. Percentages are shown in parentheses below the lanes.

Cell lysate: IP: anti-myc(WWOX) (lanes 1-4), Input (lanes 5-6). VLP: lanes 1-3. WB: anti-eVP40 and anti-myc(WWOX). (kDa) 55, 36.

Cell lysate: IP: anti-myc(WWOX) (lanes 1-4), Input (lanes 5-6). VLP: lanes 1-3. WB: anti-eVP40 and anti-myc(WWOX). (kDa) 55, 36.

Cell lysate: IP: anti-myc(WWOX) (lanes 1-4), Input (lanes 5-6). VLP: lanes 1-3. WB: anti-mVP40 and anti-myc(WWOX). (kDa) 55, 36.

Cell lysate: IP: anti-myc(WWOX) (lanes 1-4), Input (lanes 5-6). VLP: lanes 1-3. WB: anti-mVP40 and anti-myc(WWOX). (kDa) 55, 36.

Cell lysate: IP: anti-myc(WWOX) (lanes 1-4), Input (lanes 5-6). VLP: lanes 1-3. WB: anti-LASV-Z and anti-myc(WWOX). (kDa) 25, 15, 55, 36.

Cell lysate: IP: anti-myc(WWOX) (lanes 1-4), Input (lanes 5-6). VLP: lanes 1-3. WB: anti-LASV-Z and anti-myc(WWOX). (kDa) 25, 15, 55, 36.



**A.**

|            |   |   |
|------------|---|---|
| eVP40      | + | + |
| si-control | + | - |
| si-WWOX    | - | + |

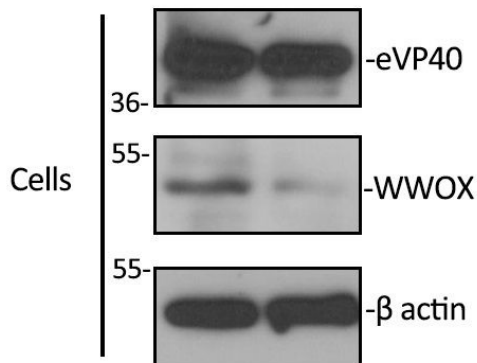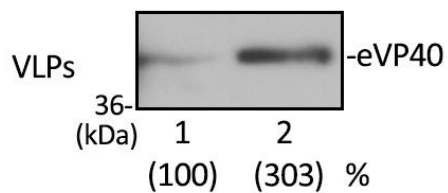**B.**

|            |   |   |
|------------|---|---|
| mVP40      | + | + |
| si-control | + | - |
| si-WWOX    | - | + |

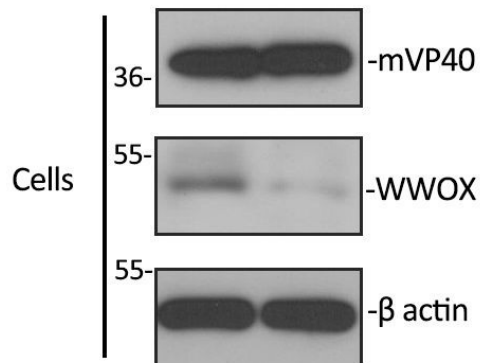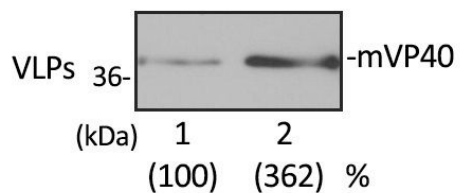**C.**

|            |   |   |
|------------|---|---|
| LASV-Z     | + | + |
| si-control | + | - |
| si-WWOX    | - | + |

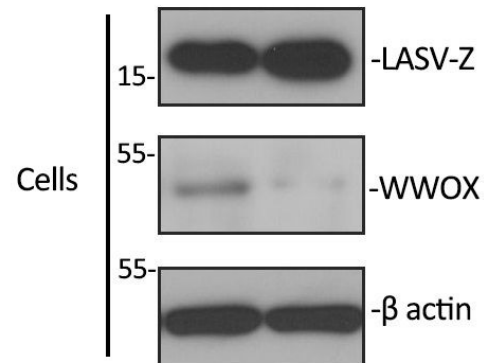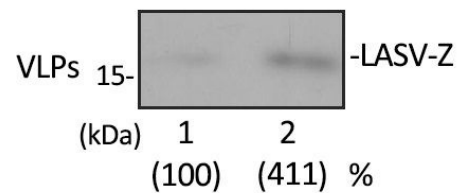**D.**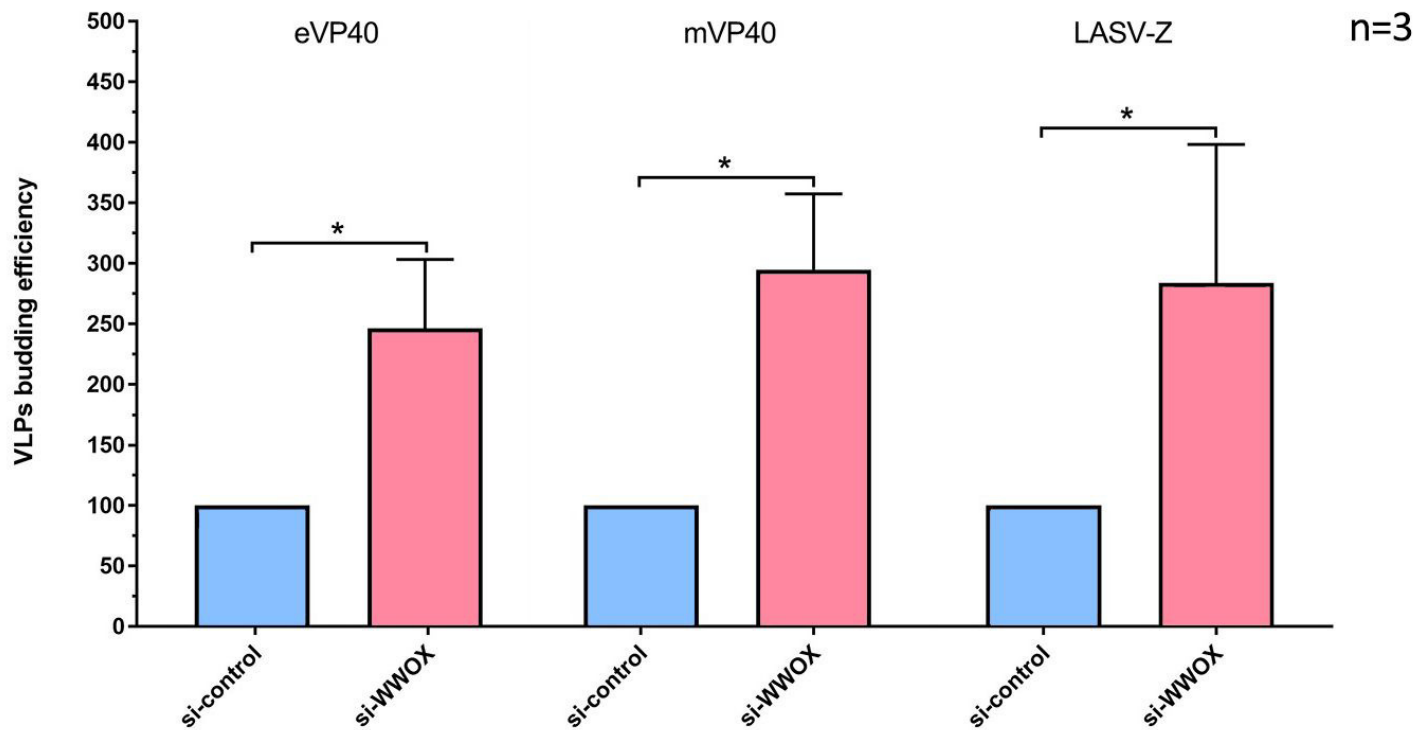

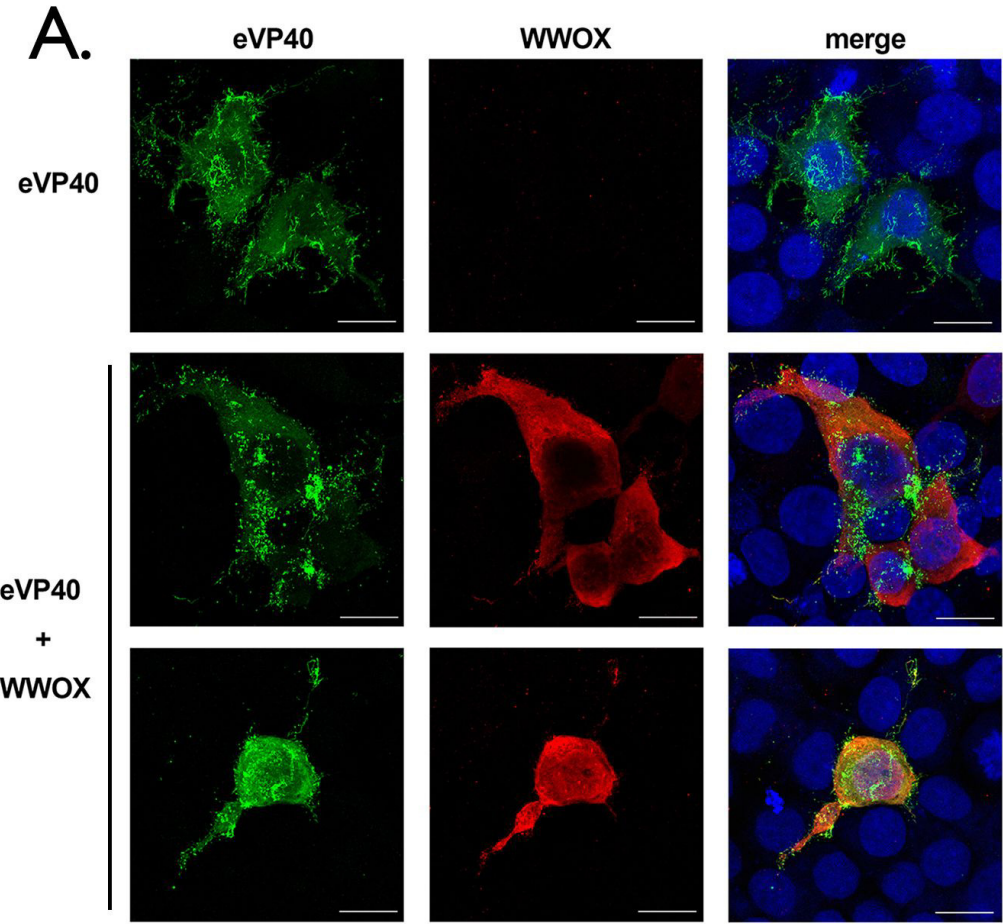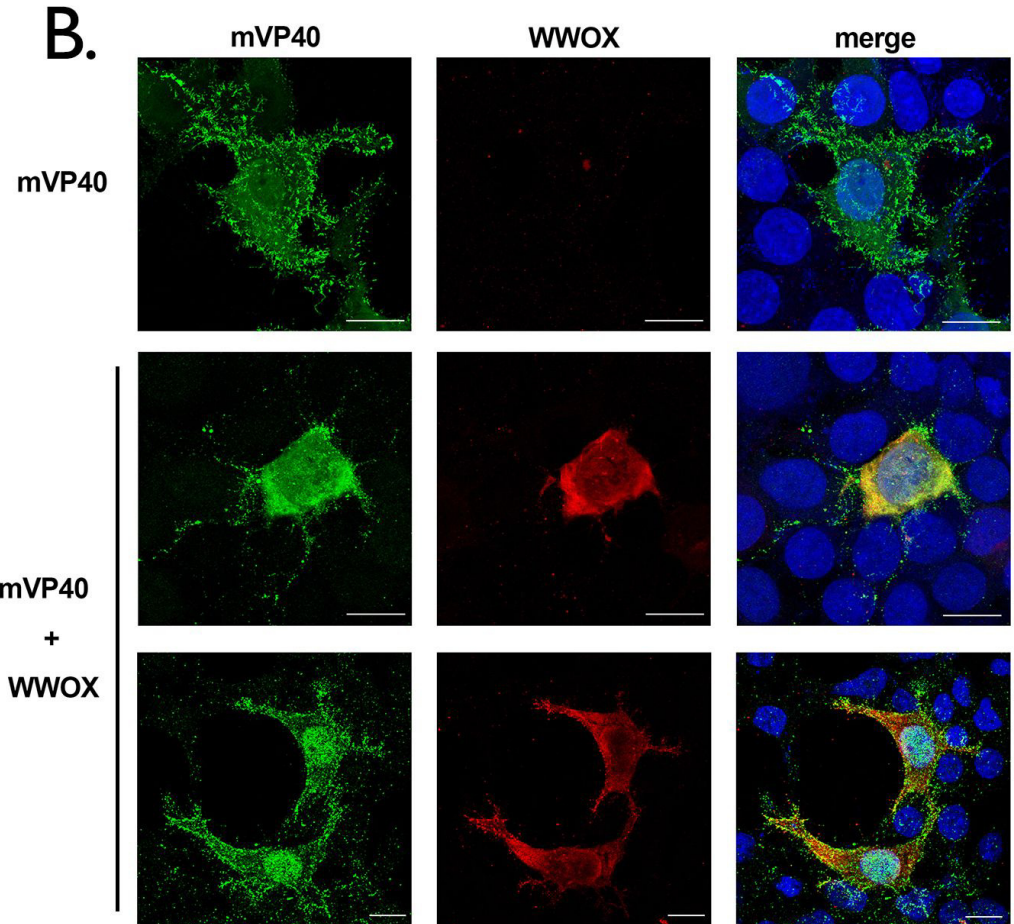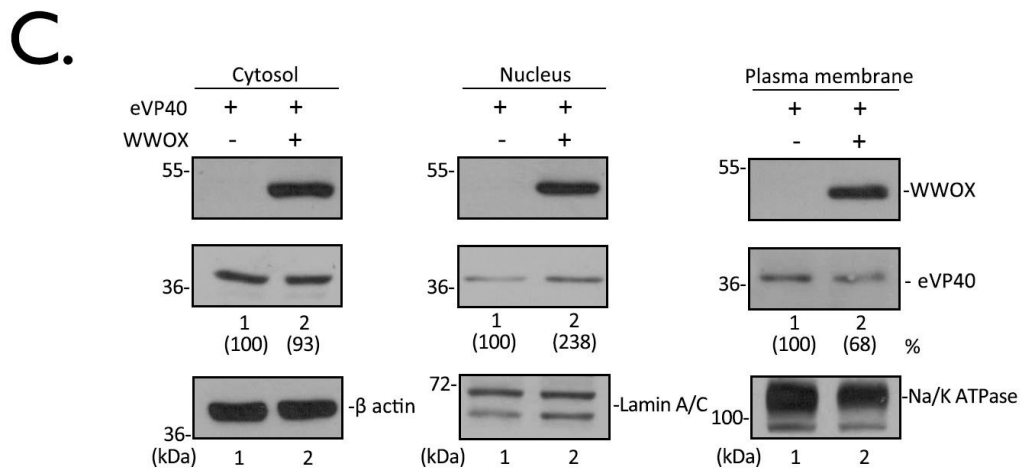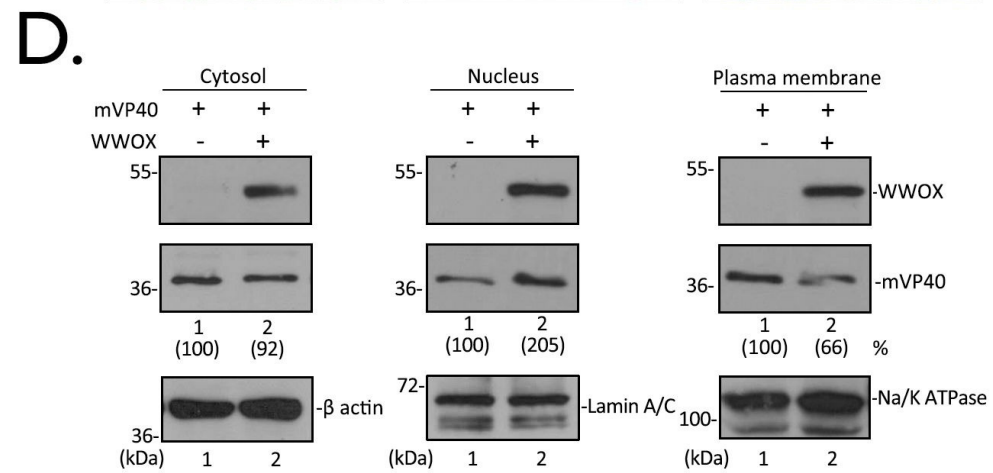

**A.**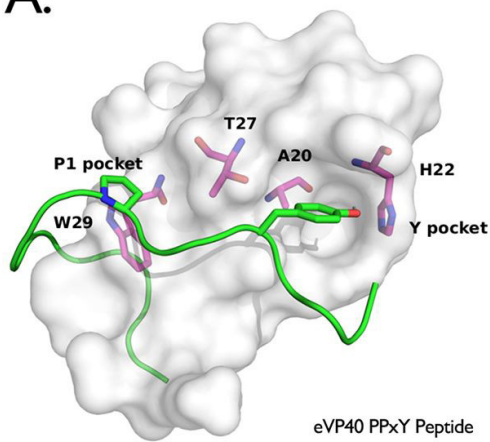**B.**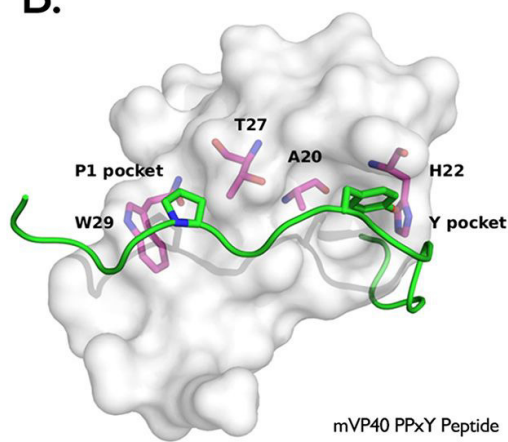**C.**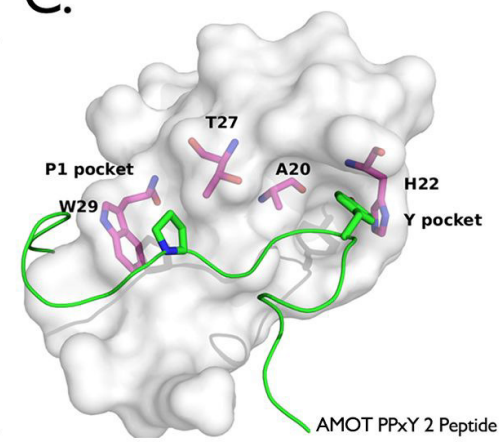**D.**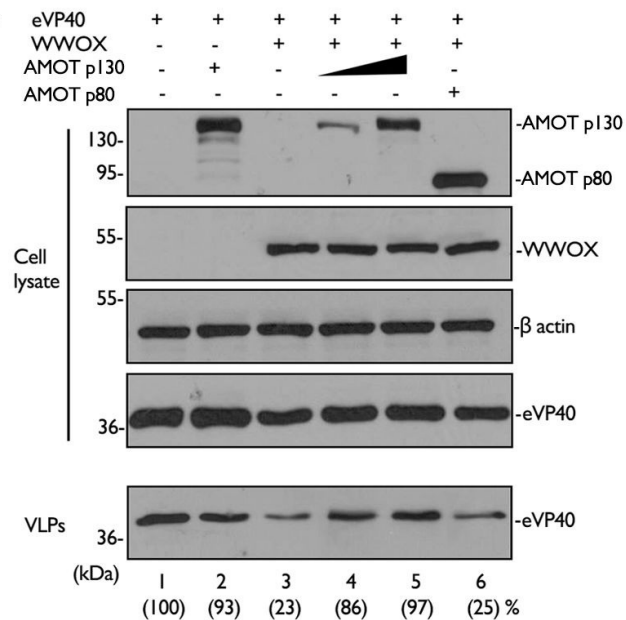**E.**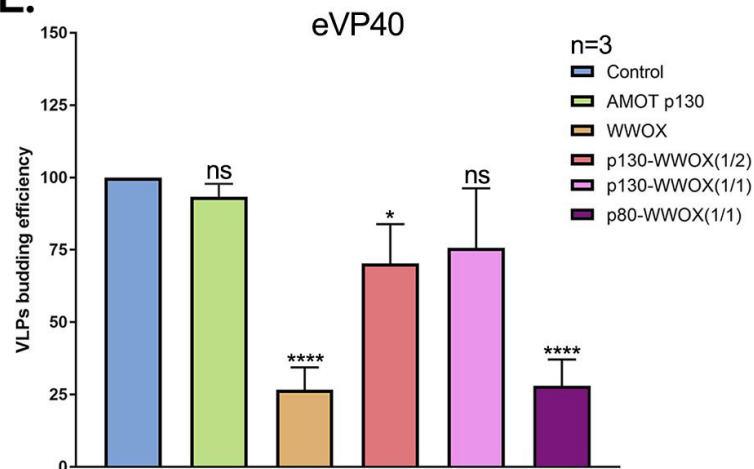**G.**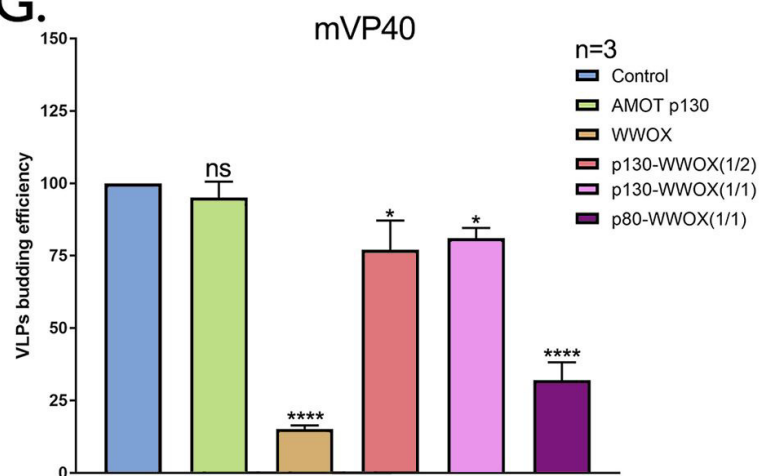**F.**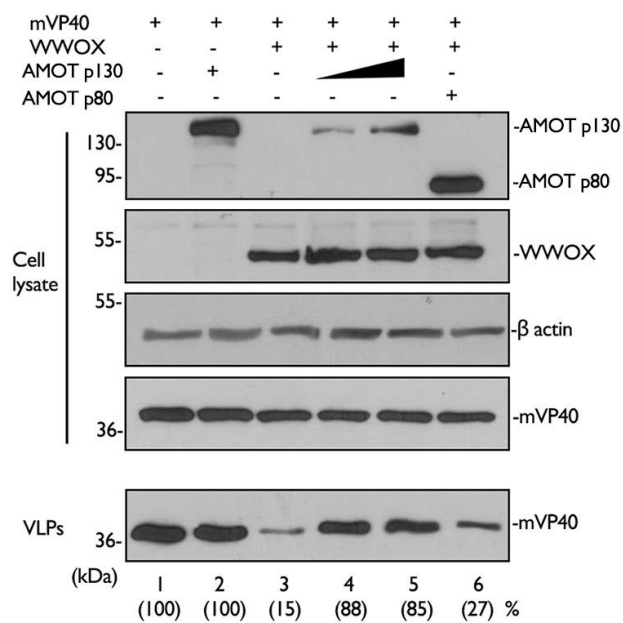**H.**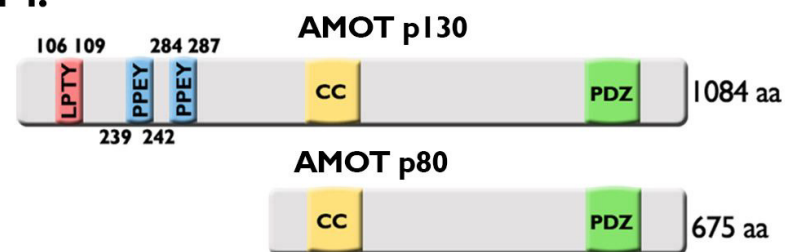

**A.**

VSV-M40 0.1 MOI

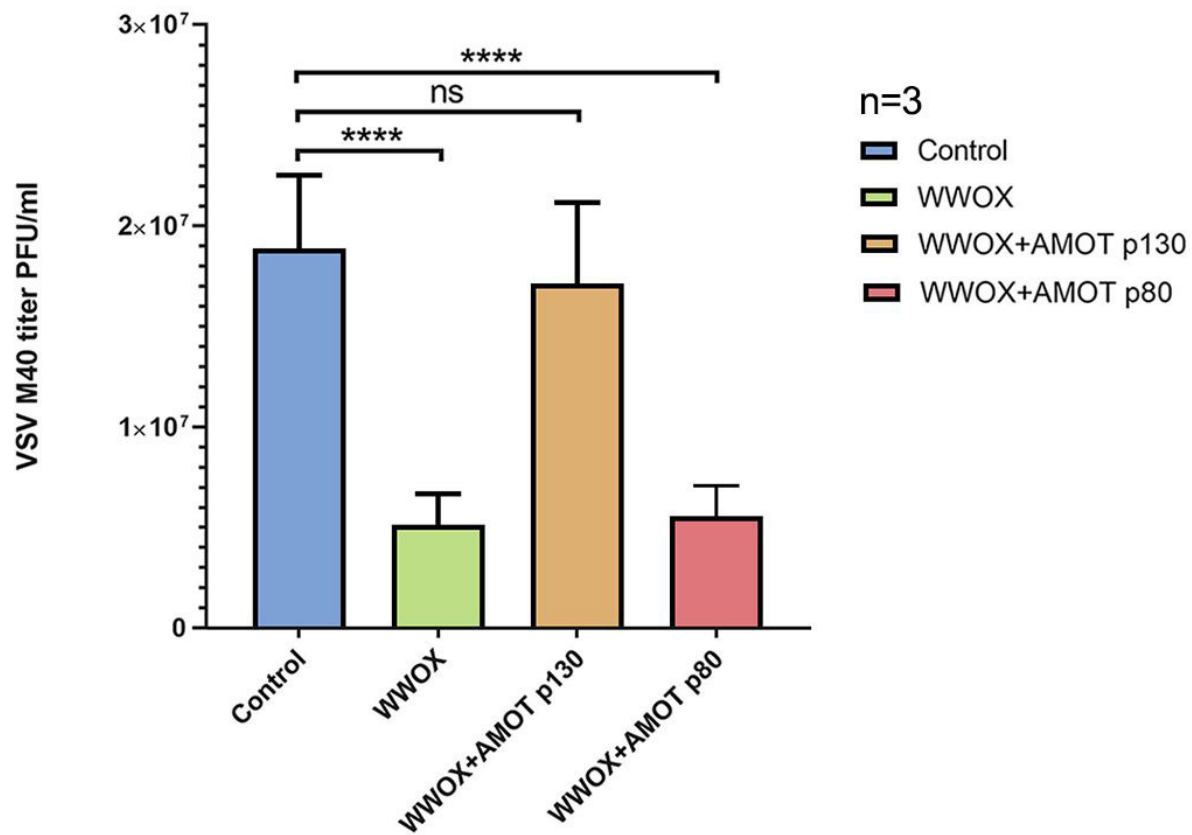**B.**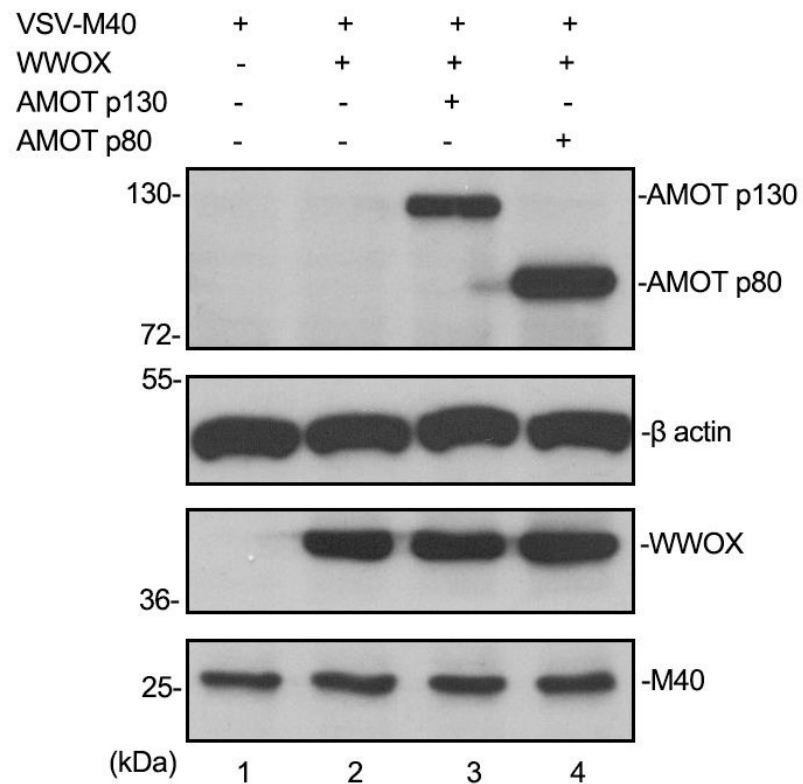

Source: https://www.biorxiv.org/content/10.1101/2021.01.26.428359v1.full.pdf
